Roelfs et al. | Phenotypically independent mental health profiles are genetically related

1 **Phenotypically independent mental health profiles are genetically related**

2 Daniel Roelfs<sup>1,\*</sup>, MSc, Dag Alnæs<sup>1</sup>, PhD, Oleksandr Frei<sup>1</sup>, PhD, Dennis van der Meer<sup>1,2</sup>, PhD, Olav B.  
3 Smeland<sup>1</sup>, PhD, Ole A. Andreassen<sup>1</sup>, PhD, Lars T. Westlye<sup>1,3</sup>, PhD, Tobias Kaufmann<sup>1,\*</sup>, PhD

4  
5 <sup>1</sup> *NORMENT, KG Jebsen Centre for Neurodevelopmental Disorders, Division of Mental Health and  
6 Addiction, Oslo University Hospital & Institute of Clinical Medicine, University of Oslo, Oslo, Norway*

7 <sup>2</sup> *School of Mental Health and Neuroscience, Faculty of Health, Medicine and Life Sciences, Maastricht  
8 University, Maastricht, The Netherlands*

9 <sup>3</sup> *Department of Psychology, University of Oslo, Oslo, Norway*

10

11 \* Correspondence: Daniel Roelfs & Tobias Kaufmann, Ph.D.

12 Email: [daniel.roelfs@medisin.uio.no](mailto:daniel.roelfs@medisin.uio.no), [tobias.kaufmann@medisin.uio.no](mailto:tobias.kaufmann@medisin.uio.no)

13 Postal address: OUS, PO Box 4956 Nydalen, 0424 Oslo, Norway

14 Telephone: +47 23 02 73 50, Fax: +47 23 02 73 33

15

16 Counts: Main: 3545 words | Abstract: 244 words | Figures: 4 | References: 41

17 **Abstract**

18 **Background:** Genome-wide association studies (GWAS) and family-based studies have revealed partly  
19 overlapping genetic architectures between various psychiatric disorders. Given clinical overlap between  
20 disorders our knowledge of the genetic architectures underlying specific symptom profiles is limited. Here,  
21 we aimed to derive distinct profiles of mental health in healthy individuals and to study how these  
22 genetically relate to each other and to common psychiatric disorders.

23 **Methods:** We decomposed self-report mental health questionnaires from 136,678 healthy individuals of the  
24 UK Biobank, excluding data from individuals with a diagnosed neurological or psychiatric disorder, into  
25 thirteen distinct mental health profiles using independent component analysis. Utilizing genotypes from  
26 117,611 of those individuals with Caucasian ancestry, we performed GWAS for each mental health profile  
27 and assessed genetic correlations between these profiles, and between the profiles and common psychiatric  
28 disorders and cognitive traits.

29 **Results:** We found that mental health profiles were genetically correlated with a wide range of psychiatric  
30 disorders and cognitive traits, with strongest effects typically observed between a given mental health profile  
31 and a disorder for which the profile is common (e.g. depression symptoms and major depressive disorder,  
32 psychosis and schizophrenia). Strikingly, although the profiles were phenotypically uncorrelated, many of  
33 them were genetically correlated with each other.

34 **Conclusions:** This study provides evidence that statistically independent mental health profiles in healthy  
35 individuals partly share genetic underpinnings and show genetic overlaps with psychiatric disorders,  
36 suggesting that shared genetics across psychiatric disorders cannot be exclusively attributed to the  
37 overlapping symptomatology between the disorders.

## 38 **Introduction**

39 Psychiatric disorders are highly polygenic, exhibiting a multitude of significantly associated genetic variants  
40 with small effect sizes. Recent large-scale genome-wide association studies (GWAS) have identified a large  
41 number of single-nucleotide polymorphisms (SNP) associated with psychiatric disorders such as  
42 schizophrenia (SCZ)<sup>1</sup>, bipolar disorder (BD)<sup>2</sup>, major depression (MD)<sup>3</sup>, attention deficit hyperactivity  
43 disorder (ADHD)<sup>4</sup>, autism spectrum disorders (ASD)<sup>5</sup>, post-traumatic stress disorder (PTSD)<sup>6</sup>, and anxiety  
44 (ANX)<sup>7</sup>. In addition to substantial polygenicity, previous findings have documented genetic overlap  
45 between disorders<sup>8-11</sup>, even in the absence of genetic correlations as recently demonstrated for schizophrenia  
46 and educational attainment<sup>12,13</sup>. Adding to the complexity, psychiatric disorders also overlap with multiple  
47 complex traits, such as BMI<sup>14</sup> and cardio-metabolic diseases<sup>15</sup>. Taken together, the landscape of current  
48 psychiatric genetics suggests highly complex patterns of associations and unclear specificity for many  
49 common psychiatric disorders.

50  
51 While GWAS studies have allowed to disentangle parts of the genetic architecture of psychiatric disorders,  
52 these methods alone are not sufficient to answer some of the challenges posed in psychiatric genetics. One  
53 of those challenges is the lack of clinical demarcation between psychiatric disorders. For example, patients  
54 with the same diagnosis may not necessarily exhibit common symptoms<sup>16</sup> and patients with different  
55 diagnoses may show highly overlapping clinical phenotypes<sup>17</sup>. The notion that mental disorders like  
56 schizophrenia and bipolar disorders reflect biologically heterogeneous categories is also supported by  
57 neuroimaging studies<sup>18,19</sup>. Nonetheless, a majority of large-scale genetic studies use a classical case-control  
58 design based on a categorical operationalization of disease without stratifying other measures such as  
59 symptoms, functioning or symptom severity. Likewise, control groups are rarely screened for subthreshold  
60 symptoms. For example in the case of psychosis, approximately 6% of the general population are reported  
61 to have a psychotic experience in their lifetime, and only a minority of that group will develop a diagnosed  
62 psychiatric illness such as schizophrenia or bipolar disorder<sup>20</sup>. Finally, the likelihood of inducing selection  
63 bias when drawing cases and controls from different populations are high and may impose confounds in  
64 case-control designs<sup>21</sup>. Thus, whereas studies using the classical case-control design have been instrumental  
65 and produced a strong body of discoveries in psychiatric genetics, these designs have limitations that may  
66 prevent us from discovering signal more closely related to clinical characteristics of the disorder. In addition,  
67 case-control designs require immense effort and resources given that the high polygenicity of common  
68 psychiatric disorders requires vast sample sizes to detect effects<sup>22</sup>.

69  
70 Recent large-scale population level efforts such as the UK Biobank<sup>23</sup> now provide alternatives for the study  
71 of psychiatric disorders. The mental health data available in UK Biobank includes data from more than  
72 150,000 individuals and covers questions on current and previous symptoms in different psychiatric

73 domains<sup>24</sup>. For example, a recent study revealed genetic associations with psychotic experiences in the UK  
74 Biobank and reported genetic correlations between psychotic experience and common psychiatric  
75 disorders<sup>25</sup>. While this study formed two groups of subjects (with and without psychotic experience) others  
76 have suggested continuous measures of psychopathology obtained from questionnaire data, such as the p-  
77 factor<sup>26</sup>. While bundling variance of psychopathology in a single common factor can be a useful proxy of  
78 mental health vulnerability, the specificity of the p-factor to disorder-specific mechanisms is limited<sup>26</sup>.  
79 Independent component analysis<sup>27,28</sup> provides a complementary approach to decompose the variance from  
80 mental health questionnaires into independent latent variables. For example, using independent component  
81 analysis on mental health questionnaires of children and adolescents, Alnæs and colleagues have identified  
82 a set of independent components reflecting symptoms of attention deficit, psychosis, depression, anxiety,  
83 and more<sup>29</sup>. Independent components obtained from mental health questionnaires may each capture either  
84 global (e.g. joint symptoms of depression, stress and anxiety) or specific aspects (e.g. pure psychosis  
85 symptoms) of mental health in a data-driven fashion, thereby yielding multiple distinct profiles of mental  
86 health symptoms beyond a common p-factor.

87  
88 Here, in order to disentangle the genetic architecture underlying psychiatric symptoms and traits we  
89 investigated structures of psychopathology and corresponding genetics using independent component  
90 analysis in the UK Biobank mental health data. This allowed us to study the genetic relationships between  
91 statistically independent mental health profiles, and between these profiles and psychiatric disorders as well  
92 as cognitive traits. We focused our analysis on data from individuals who had no previous diagnosis with a  
93 neurological or psychiatric disorder, yielding novel insights into variation in mental health in a healthy  
94 population. Given that preclinical symptoms in healthy individuals may share biological mechanisms with  
95 symptoms in diagnosed individuals, we hypothesized that the genetic architecture of specific variations in  
96 mental health in *healthy* (undiagnosed) individuals overlaps with specific major psychiatric disorders.  
97 However, we did not have an a-priori hypothesis for the degree of specificity. The known pleiotropy  
98 between major psychiatric disorders (reproduced in Suppl. Fig. 1) might reflect similar symptoms occurring  
99 in different disorders or similar mechanisms underlying different symptoms. We therefore investigated if  
100 statistically independent mental health profiles are also genetically independent or if they share a common  
101 genetic architecture, which may yield insights into the sources of pleiotropy in psychiatric genetics.

102

## 103 **Methods and Materials**

### 104 *Sample and exclusion criteria*

105 We accessed data from the UK Biobank<sup>23</sup> with permission no. 27412, and included data from individuals  
106 who had participated in an online follow-up interview on mental health (UK Biobank category 136). All  
107 participants provided signed informed consent before inclusion in the study. UK Biobank was approved by

108 the National Health Service National Research Ethics Service (ref. 11/NW/0382). Participants with a  
109 diagnosed psychiatric or neurological disorder (F or G ICD10 diagnosis) were excluded from the analysis  
110 except for those with a nerve, nerve root and plexus disorders (categories G50 to G59). In addition, we  
111 excluded participants with more than 10% missing answers in the mental health questionnaires. This  
112 resulted in mental health data from 136,678 individuals, which was used in an independent component  
113 analysis. For the genetic analysis, we selected data from all Caucasian individuals with available genotypes,  
114 yielding a set of 117,611 participants aged 47-80 years (mean: 64, SD: 7.66, age at mental health assessment)  
115 and comprised 56.2% females.

116

#### 117 *Processing of mental health data*

118 Fig. 1A depicts the analysis workflow. Of the 60 primary questions that were available as part of the mental  
119 health online assessment, we removed questions that asked specifically about symptoms occurring in the  
120 past two weeks to remove potential short-term temporal effects. Furthermore, we excluded questions where  
121 more than 10% of the responses were missing (1 question excluded). In the resulting set of 43 questions  
122 (Suppl. Table 1), we imputed missing data using k-nearest neighbor imputation with  $k = 3$  with the bnstruct  
123 package<sup>30</sup> in R<sup>31</sup> and z-standardized the data (Suppl. Fig. 2).

124

125 The resulting data covering 43 questions from 136,678 individuals was decomposed using independent  
126 component analysis (ICA). Using icasso<sup>32</sup> in MATLAB and by visually inspecting the loadings of the  
127 questions on the components, we estimated that a model order of 13 independent components yields the  
128 best clustering solution where the resulting components are stable and highly interpretable. The PCA  
129 identified 13 components with an eigenvalue larger than 1, and stability (Iq) was effectively 1. A model  
130 order lower than 13 would group together questions into components which we preferred to keep separate.  
131 A model order larger than 13 was not reasonable as it would yield components that largely reflect single  
132 items. The individual scores for each of the 43 questions were subsequently residualized for age (both linear  
133 and quadratic term), sex, and the first 20 genetic principal components. Next, we decomposed the items into  
134 13 independent components using the fastICA algorithm as implemented in R<sup>33</sup>. Fig. 1B depicts how each  
135 of the 43 items loaded on the components, indicating independent components (ICs) that captured questions  
136 on sexual abuse (IC1), psychosis (IC2), anxiety, depression and mental distress (IC3), a diagnosis with a  
137 life-threatening illness (IC4), social instability (IC5), traumatic experiences (IC6), stress in the past month  
138 (IC7), experiences of feeling loved (IC8), thoughts around self-harm behavior (IC9), general happiness  
139 (IC10), addiction behavior and manic experiences (IC11), experiences of emotional abuse (IC12), and  
140 alcohol abuse (IC13).

Roelfs et al. | Phenotypically independent mental health profiles are genetically related

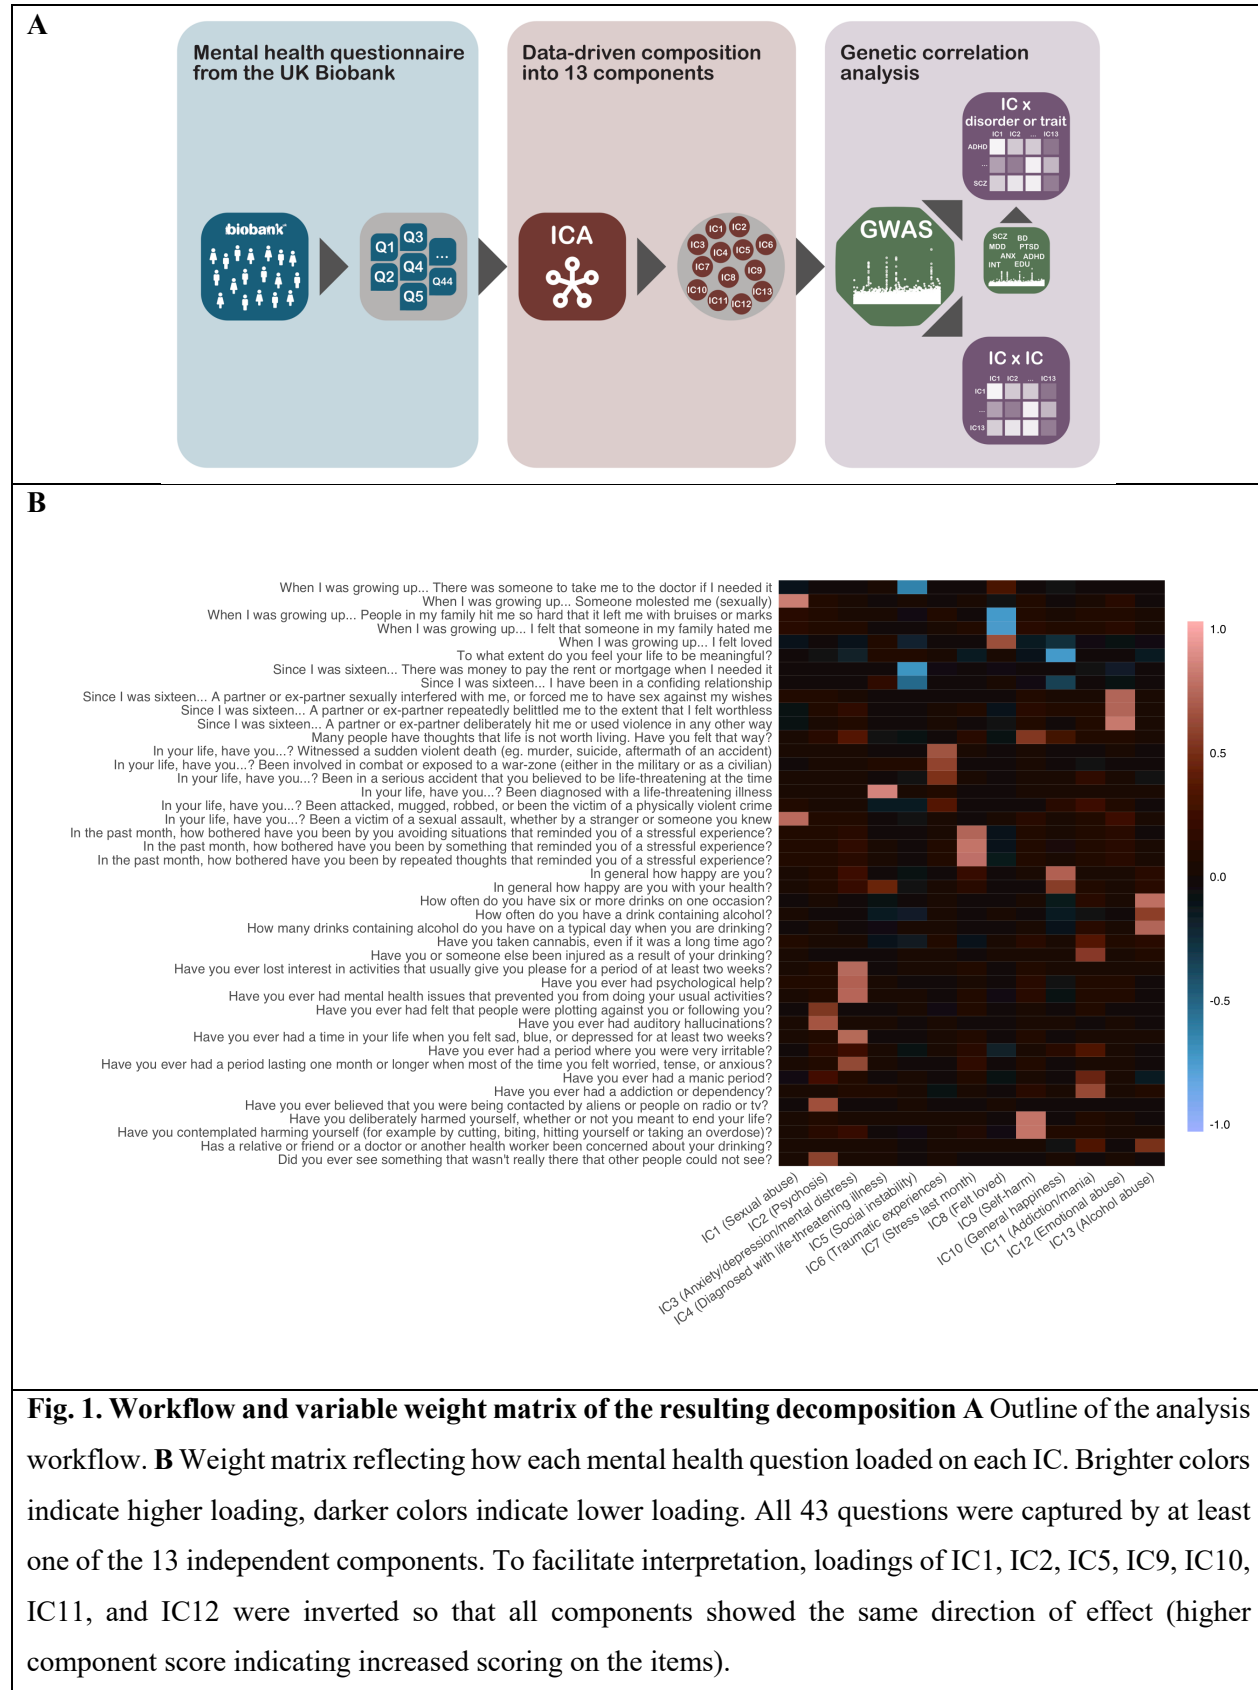

**Fig. 1. Workflow and variable weight matrix of the resulting decomposition** **A** Outline of the analysis workflow. **B** Weight matrix reflecting how each mental health question loaded on each IC. Brighter colors indicate higher loading, darker colors indicate lower loading. All 43 questions were captured by at least one of the 13 independent components. To facilitate interpretation, loadings of IC1, IC2, IC5, IC9, IC10, IC11, and IC12 were inverted so that all components showed the same direction of effect (higher component score indicating increased scoring on the items).

142 The distribution of IC2 indicated very few non-zero scores (Suppl. Fig. 3). This component loaded mostly  
143 on psychosis questions (Fig. 1B), indicating that only few of the included healthy individuals had symptoms  
144 in this domain. We therefore conducted an additional supplemental analysis in which we dichotomized IC2  
145 such that loadings lower than 1 were labeled as “no/few symptoms”, and loadings equal to or higher than 1  
146 were labeled as “with symptoms”.

147

#### 148 *Processing of genetic data*

149 From the UK Biobank v3 imputed genetic data, we removed SNPs with an imputation quality score below  
150 0.5, with a minor allele frequency below 0.001, missing in more than 5% of individuals, and that failed the  
151 Hardy-Weinberg equilibrium test at  $p < 1e-9$ . We removed also individuals with more than 10% missing  
152 data. We performed a genome-wide association analysis (GWAS) on each of the 13 independent  
153 components in PLINK 2<sup>34,35</sup>. Using a publicly available conversion toolbox for GWAS summary statistics  
154 ([github.com/precimed/python\\_convert](https://github.com/precimed/python_convert)), we removed the MHC region and calculated a z-score for every  
155 SNP (8,165,726 SNPs after QC). We utilized linkage-disequilibrium score regression<sup>10,36</sup> to estimate genetic  
156 correlations between each of the independent components, and between the components and publicly  
157 available GWAS summary statistics for SCZ<sup>1</sup>, BD<sup>2</sup>, MD<sup>37</sup>, ADHD<sup>4</sup>, ASD<sup>5</sup>, PTSD<sup>6</sup>, ANX<sup>7</sup>, as well as  
158 intelligence<sup>38</sup>, and educational attainment<sup>39</sup> (Suppl. Table 2). For all aforementioned GWASs, we used those  
159 versions that did not have UK Biobank participants included. From the MD GWAS, we removed  
160 participants from the 23andMe dataset as well, leaving only cases with a diagnosed major depressive  
161 disorder (MDD). Prior to estimating genetic correlations, we set a threshold that only ICs with a heritability  
162 1.96 times larger than its standard error should be included in the analysis and only those where visual  
163 quality control of corresponding Q-Q plots indicated genetic signal. These quality control steps were  
164 implemented to ensure that we did not make inferences on data that did not provide sufficient variance  
165 explained by genetics. Partitioned heritability<sup>40</sup> was estimated using the LDSC toolbox<sup>36</sup> and Q-Q plots were  
166 generated using custom scripts in R. Finally, we processed the GWAS summary statistics of each  
167 independent component through the Functional Mapping and Annotation toolbox (FUMA) to map lead  
168 SNPs onto genes<sup>41</sup>. FUMA parameters were kept as default, and we used the FUMA default European  
169 ancestry reference panel.

170

#### 171 *Code and data availability*

172 Code and GWAS summary statistics will be made publicly available via GitHub ([github.com/norment](https://github.com/norment)) upon  
173 acceptance of the manuscript. Furthermore, the derived independent components (individual level data) will  
174 be made available to the UK Biobank upon acceptance (derived variable return) to allow its use in future  
175 UK Biobank studies.

176



177 **Results**

178 Fig. 2 depicts SNP-based heritability ( $h^2$ ) for the 13 ICs (Suppl. Table 3 for additional statistics). Heritability  
179 was generally low, yet all components yielded a heritability that was higher than 1.96 times the standard  
180 error. IC13, capturing questions on alcohol abuse had the highest heritability ( $h^2 = 0.0763$ ,  $SE = 0.0055$ ),  
181 closely followed by IC3, capturing anxiety, depression, and mental distress ( $h^2 = 0.0744$ ,  $SE = 0.0052$ ). The  
182 lowest heritability among the components was for IC2, reflecting psychosis questions ( $h^2 = 0.0089$ ,  $SE =$   
183  $0.0043$ ), likely owing to the low number of individuals with psychosis symptoms (Suppl. Fig. 3). We  
184 therefore performed a supplemental analysis to investigate if dichotomization of this IC would benefit the  
185 analysis (Suppl. Fig. 4). In brief, as dichotomization only slightly improved heritability estimates, we kept  
186 IC2 as a continuous component for the main analysis to stay consistent with the other components, yet we  
187 provide results with the dichotomized component in Suppl. Fig. 4. In addition to passing the heritability  
188 criterion of 1.96 times the standard error, the Q-Q plots of all ICs passed visual quality control (Suppl. Fig.  
189 5) warranting inclusion of all components into subsequent genetic correlation analyses.

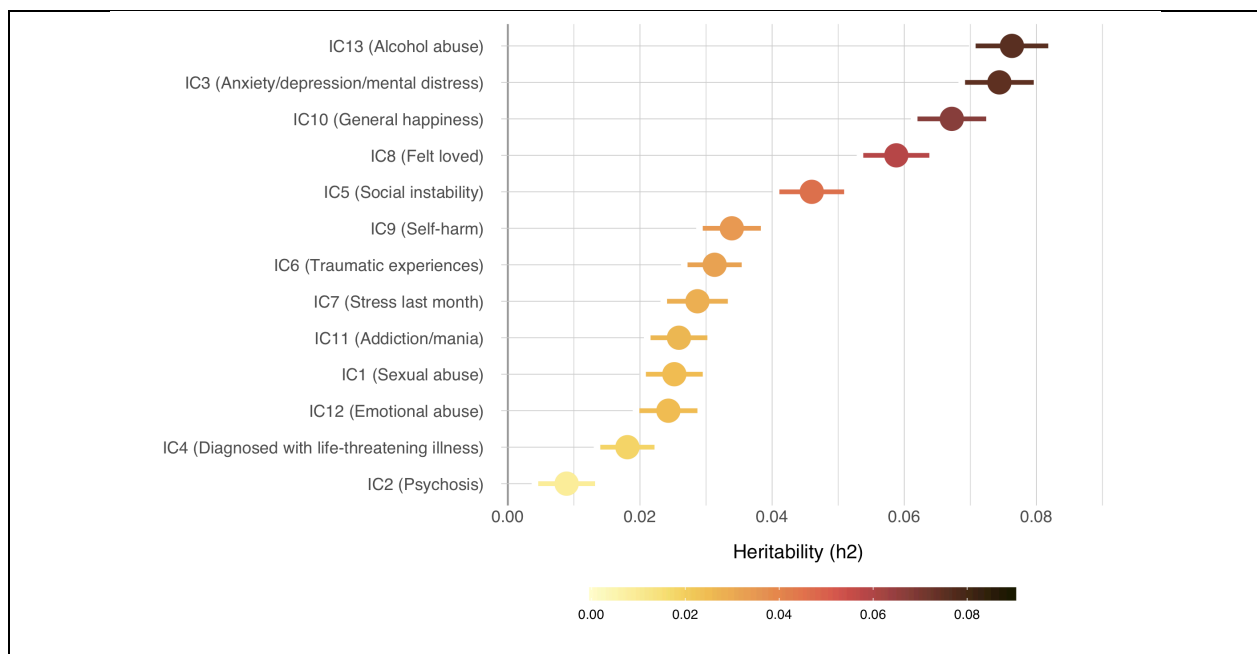

**Fig. 2. Heritability estimates of the independent components** SNP-based heritability for each IC sorted by decreasing heritability ( $h^2$ ). Heritability calculated using the LDSC toolbox<sup>36</sup>. Error bars reflect standard errors.

190



Roelfs et al. | Phenotypically independent mental health profiles are genetically related

191 Except for IC4, all ICs showed genome wide significant SNPs at a threshold of  $5e-8$  (Suppl. Fig. 6). Using  
 192 FUMA, we discovered 7 independent loci for IC13, 2 for IC2, IC7, and IC8, 1 locus for IC1, IC3, IC5, IC10,  
 193 IC11, and IC12, and IC4, IC6, and IC9 had no significant genetic risk loci. Suppl. Table 4 provides a list of  
 194 mapped genes for all ICs, illustrating that IC13 had the most mapped genes among all ICs (74 mapped  
 195 genes).

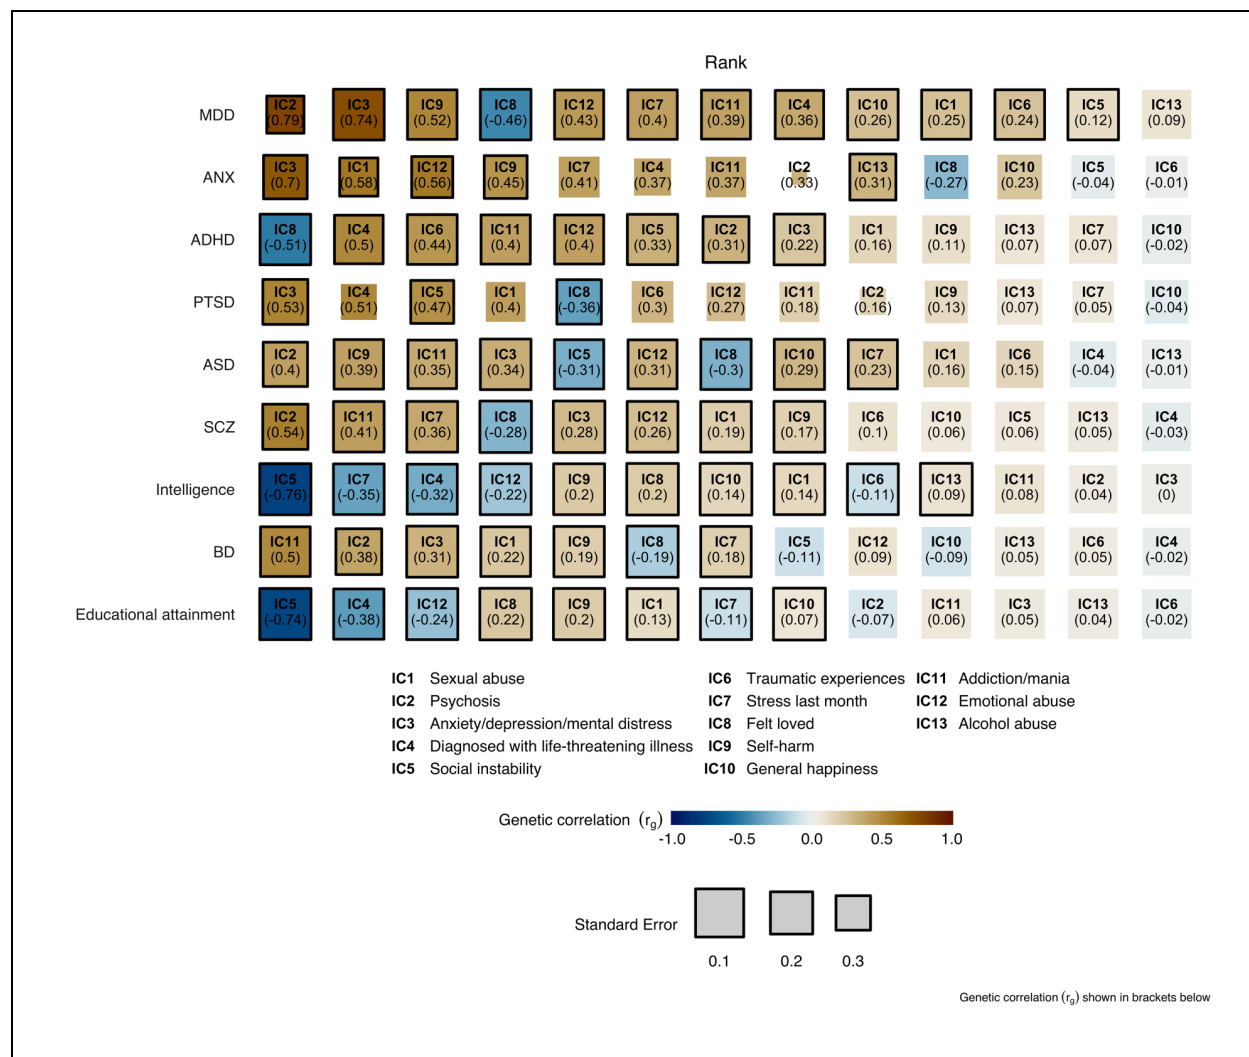

**Fig. 3. Genetic correlation between the independent components and disorders and cognitive traits**

For each disorder, the associations with ICs are sorted by decreasing absolute genetic correlation such that the most leftward box reflects the strongest association between a given disorder and the 13 ICs. Numbers in brackets under each IC label denote the genetic correlation ( $r_g$ ). Size of the boxes reflect the standard error. Significant correlations ( $p < FDR$ ) are indicated with a black border.

196

Roelfs et al. | Phenotypically independent mental health profiles are genetically related

197 We assessed genetic correlations between each of the 13 ICs and a set of psychiatric disorders as well as  
198 cognitive traits. Out of 117 comparisons, 70 were significant after FDR correction, which amounts to 59%.  
199 Fig. 3 depicts all genetic correlations with ICs, sorted separately for each disorder or cognitive trait (sorted  
200 by absolute genetic correlation). We found that in most cases the strongest genetic correlation was with the  
201 IC most closely related to that disorder or trait. For example, anxiety most strongly correlated with IC3,  
202 which reflects anxiety, depression, and mental distress (genetic correlation  $r_g = 0.70$ ,  $p_{FDR} < .00027$ ). SCZ  
203 was most highly correlated with IC2, which represents psychosis questions ( $r_g = 0.54$ ,  $p_{FDR} = .001$ ). The  
204 highest genetic correlation of BD was with IC11, which represents addiction and mania ( $r_g = 0.5$ ,  $p_{FDR} =$   
205  $6.5e-12$ ). For PTSD, the component reflecting traumatic experience (IC6) only ranked sixth among the  
206 sorted associations, yet the two ICs showing strongest association with PTSD reflected anxiety, depression,  
207 and mental distress (IC3;  $r_g = 0.53$ ,  $p_{FDR} = .0017$ ) and diagnosed with life-threatening illness (IC4;  $r_g = 0.51$ ,  
208  $p_{FDR} = .080$ ), both of which are closely related to PTSD. ASD correlated strongest with IC2 (reflecting  
209 psychosis;  $r_g = 0.40$ ,  $p_{FDR} = .031$ ) and ADHD correlated strongest with IC8 (Felt loved;  $r_g = -0.51$ ,  $p_{FDR} =$   
210  $4.7e-21$ ). Educational attainment and intelligence were both strongest negatively correlated with the IC  
211 reflecting social instability (IC5,  $r_g = -0.74$  and  $r_g = -0.76$ , respectively; both  $p_{FDR} < 2.5e-74$ ). In general, the  
212 strongest associations among all ICs, either positive or negative were with MDD while the weakest  
213 associations were with educational attainment.

214  
215 Next, we assessed the genetic correlations between the ICs. Independent components are statistically  
216 independent by design, and thus on the phenotype level the ICs were not correlated with each other (Fig. 4,  
217 lower half; correlations essentially zero). However, almost half of the IC pairs were nonetheless significantly  
218 genetically correlated with each other (45%,  $p < FDR$ ). IC3 (anxiety, depression, mental illness) was  
219 genetically correlated with 10 other ICs. IC9 (self-harm) was correlated with 9 other ICs and IC6 (traumatic  
220 experiences) and IC8 (felt loved) were each genetically correlated with eight other ICs. IC11  
221 (addiction/mania) and IC12 (emotional abuse) were each genetically correlated with seven other ICs. IC1  
222 (sexual abuse) and IC5 (social instability) were both genetically correlated with six other ICs. IC2  
223 (psychosis) was correlated with 5 other ICs. IC4 (diagnosed with life-threatening illness) and IC13 (alcohol  
224 abuse) were both genetically correlated with 4 other ICs. And IC7 (stress last month) and IC10 (general  
225 happiness) were both genetically correlated with 3 other ICs. No IC had no significant genetic correlations  
226 with other ICs. The analysis therefore revealed a large amount of genetic correlations despite statistical  
227 (phenotypic) independence of the symptom profiles.

Roelfs et al. | Phenotypically independent mental health profiles are genetically related

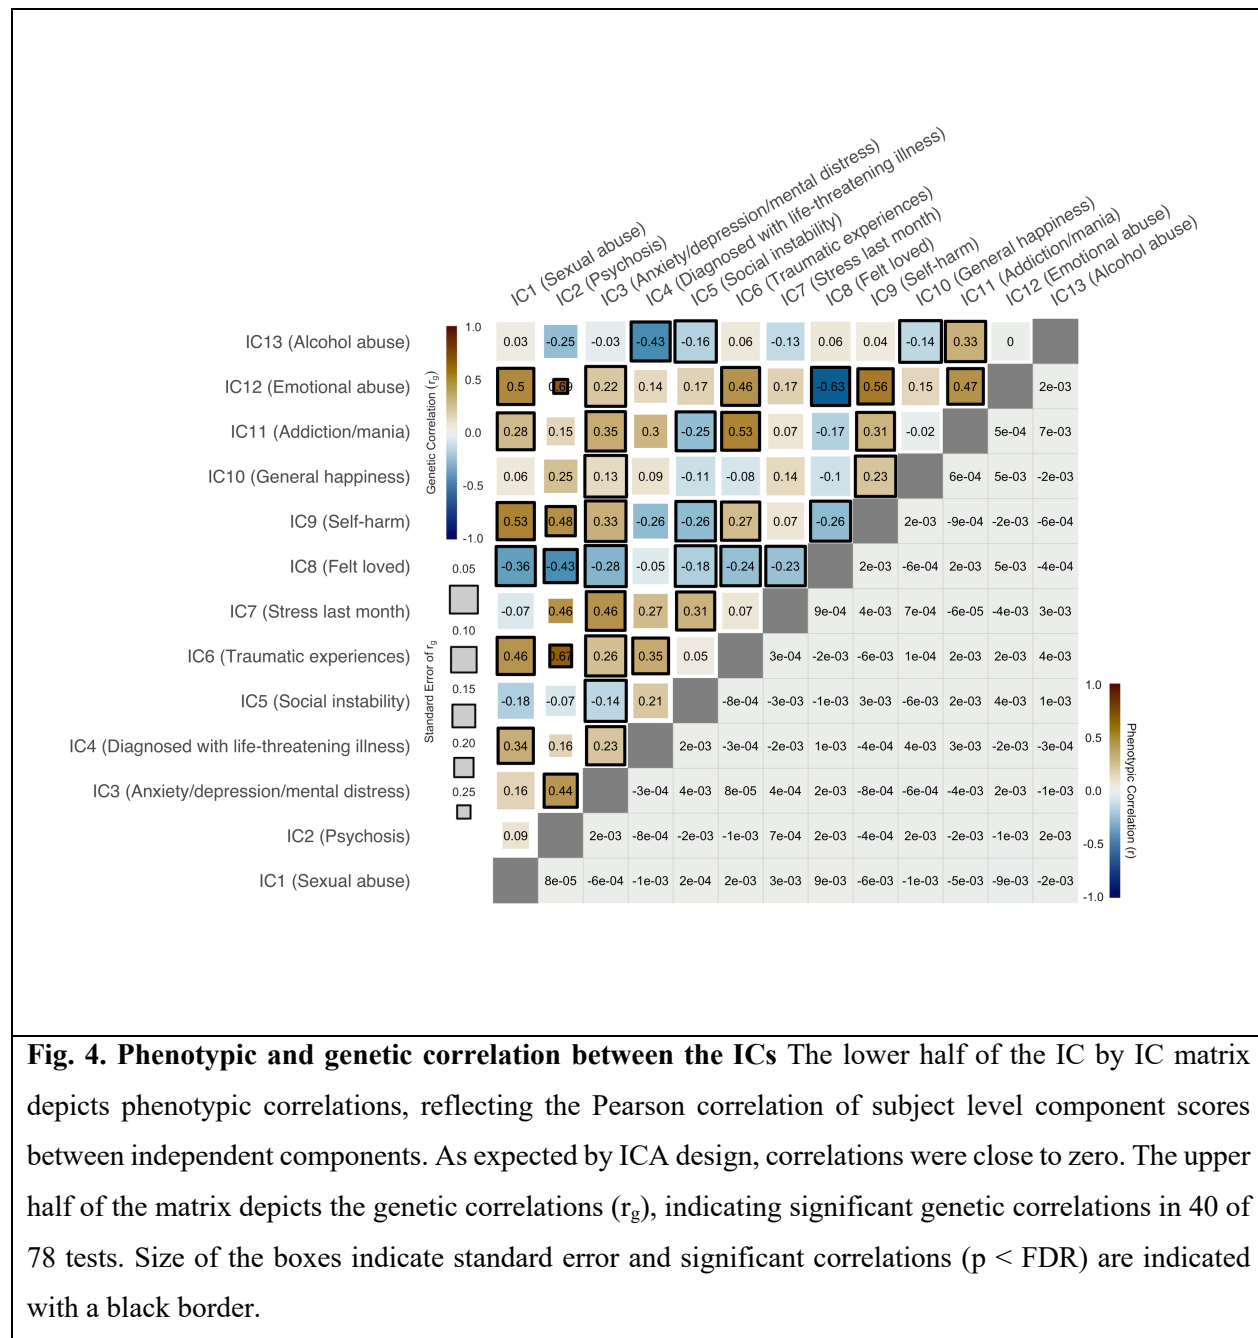

228

229 **Discussion**

230 In the present study, we decomposed mental health questionnaire data from more than 130,000 individuals  
 231 into phenotypically distinct mental health profiles (independent components). We found that variations in  
 232 mental health in healthy individuals (without a neurological or psychiatric diagnosis) were genetically  
 233 correlated with psychiatric disorders and cognitive traits. Strongest correlations were observed between  
 234 components and disorders with known symptoms in a similar domain (e.g. psychosis symptoms with  
 235 schizophrenia), but the large amount of significant correlations between disorders and mental health profiles

236 suggested limited specificity. Indeed, we found a large proportion of significant genetic correlations  
237 between the phenotypically uncorrelated profiles, suggesting overlapping genetic architectures underlying  
238 distinct symptoms. The implications of our findings are twofold. First, our results support pleiotropy in  
239 psychiatric disorders beyond overlapping symptoms (e.g. BD and MDD both involving depressive  
240 episodes), suggesting that even distinct psychiatric symptoms are genetically overlapping. Second, our  
241 findings support that normal variability in mental health within healthy individuals may inform the study of  
242 the biology of psychiatric disorders.

243  
244 While pleiotropy between major psychiatric disorders has been widely established<sup>9-11</sup> (reproduced in Suppl.  
245 Fig. 1), the sources underlying pleiotropy remain largely unknown. Specifically, disorders oftentimes  
246 overlap in symptomatology and therefore the degree to which the observed genetic correlations between  
247 disorders reflect phenotypic overlap between disorders remains to be investigated. Our approach of  
248 decomposing mental health data into distinct profiles allowed us to study genetic correlations in a sample  
249 with known phenotypic correlations and to assess how these profiles correlate with the genetics of different  
250 diagnoses. We observed that most disorders correlated strongest with the independent components capturing  
251 a related phenotype. For example, the strongest association with IC3, which reflects variance in anxiety,  
252 depression, and mental distress, was with ANX, the strongest association with IC2 (psychosis) was with  
253 SCZ. Therefore, the ranking of association strengths suggested a certain degree of specificity. However,  
254 that degree was strongly limited as most of the disorders and components were significantly genetically  
255 correlated. For example, MDD showed significant correlations between all but one component, ASD  
256 correlated with all but four components, and ANX and ADHD were correlated with all but 5 components,  
257 though correlation strengths were overall lower than with MDD, possibly due to lower sample size. There  
258 were also significant associations between components and cognitive traits although overall weaker  
259 associations compared to those with disorders. About half of the genetic correlations with intelligence and  
260 educational attainment pointed in the opposite direction, considerably more than for the psychiatric  
261 disorders, reflecting higher cognitive ability with fewer psychiatric symptoms. Importantly, when looking  
262 at the correlations between mental health profiles, we found that almost half of the genetic correlation matrix  
263 between ICs yielded significant genetic correlations despite a lack of phenotypic correlations (independence  
264 of the components). This suggests that some of the same genes are involved in the genetics of distinct mental  
265 health profiles and may indirectly support pleiotropy independent of phenotypic overlap in psychiatric  
266 disorders. Whereas more research is needed before conclusions on the sources underlying the observed  
267 pleiotropy can be drawn, one possible explanation for the significant correlations in the ICs could be that,  
268 since all independent components each capture a facet of mental health, there may be a number of SNPs  
269 that are involved across mental health symptoms. These SNPs may be involved in overall mental health,  
270 from psychological well-being to psychosis symptoms. Our analysis of significant SNPs in FUMA did not

271 identify overlapping SNPs between ICs, however, this may be attributed to the relatively low number of  
272 significant loci discovered in the ICs. Advanced statistical tools and further increasing sample sizes may  
273 help pinpoint specific genes involved with different symptoms. Furthermore, it is also plausible that  
274 environmental effects may factor into the explanation of the significant genetic correlations despite  
275 phenotypic independence if the environmental factors differ markedly between the ICs.

276

### 277 *Limitations*

278 Notable strengths of the present study include the use of data-driven decomposition of mental health data in  
279 a large sample of healthy individuals and its application to study pleiotropy in psychiatric genetics. Its main  
280 limitations include the low heritability of the resulting independent components, and the limited number of  
281 individuals with psychosis symptoms yielding suboptimal distribution in IC2 (Suppl. Fig. 3). First, it is  
282 important to note that all ICs passed quality control. Heritability of all ICs exceeded our pre-defined  
283 heritability threshold of 1.96 times its standard error, and all Q-Q plots indicated genetic signal (Suppl. Fig.  
284 5). Furthermore, low heritability can still produce good genetic signal as a result from a low number of  
285 genetic variants involved but where each has large effects<sup>13</sup>. For example, while IC2 had the lowest  
286 heritability among the ICs, it showed one of the strongest genetic signal and together with IC7 and IC8 it  
287 ranked second in terms of the number of loci discovered in FUMA, following IC13 (alcohol abuse) that  
288 showed the highest heritability, strongest genetic signal on the Q-Q plot and the largest number of significant  
289 loci and mapped genes. Second, although sample size and symptom distributions factored into the results,  
290 these are mostly reflected in the standard error of genetic associations, not in a lack of effect. For example,  
291 ANX<sup>7</sup> (n = 21,761) and PTSD<sup>6</sup> (n = 9,537) GWASs have relatively little power as reflected in the larger  
292 standard errors in genetic correlations with these disorders, but nonetheless the strongest associations with  
293 these disorders were with components that match symptoms of the disorders (both correlated strongest with  
294 IC3, reflecting anxiety/depression/mental distress). Likewise, the suboptimal symptom distributions in IC2  
295 and corresponding low heritability is reflected in large standard errors of the resulting genetic correlations  
296 but nonetheless IC2, reflecting psychosis, was most strongly associated with SCZ. Supplemental analysis  
297 with dichotomized IC2 also confirmed that the distribution alone is unlikely to explain the observed  
298 associations (Suppl. Fig. 4).

299

### 300 *Conclusion*

301 In the present study, we revealed genetic overlap between statistically independent mental health profiles  
302 and provide evidence that variations in mental health in healthy individuals relate genetically to psychiatric  
303 disorders and cognitive traits. These findings support that pleiotropy between psychiatric disorders cannot  
304 simply be explained by overlapping symptoms but may rather point to similar biological underpinnings of  
305 distinct symptoms. Our results underscore the potential of data-driven approaches to the study of mental

306 health, and suggests that supplementing the classic case-control design with a dimensional approach may  
307 improve our understanding of the genetic underpinnings of complex disorders of the mind.

308

### 309 **Acknowledgements**

310 The authors were funded by the Research Council of Norway (#276082 LifespanHealth, #223273  
311 NORMENT, #283798 ERA-NET Neuron SYNSCHIZ, #249795), the South-East Norway Regional Health  
312 Authority (2019101), and the European Research Council under the European Union's Horizon2020  
313 Research and Innovation program (ERC Starting Grant #802998), as well as the Horizon2020 Research and  
314 Innovation Action Grant CoMorMent (#847776). This research has been conducted using the UK Biobank  
315 Resource (access code 27412, <https://www.ukbiobank.ac.uk/>). This work was performed on the TSD  
316 (Tjenester for Sensitive Data) facilities, owned by the University of Oslo, operated and developed by the  
317 TSD service group at the University of Oslo, IT-Department (USIT). Computations were also performed on  
318 resources provided by UNINETT Sigma2 - the National Infrastructure for High Performance Computing  
319 and Data Storage in Norway.

320

### 321 **Conflicts of interest**

322 D.R., D.A., O.F., D.vd.M., O.B.S., L.T.W. and T.K. declare no conflicts of interest. O.A.A. is a consultant  
323 to HealthLytix and received speakers honorarium from Lundbeck.

324

### 325 **Author contributions**

326 D.R. and T.K. conceived the study; D.R. analyzed the data with contributions from T.K.; All authors  
327 contributed with conceptual input on methods and/or interpretation of results; D.R. and T.K. wrote the first  
328 draft of the paper and all authors contributed to the final manuscript.

329

### 330 **References**

- 331 1. Pardiñas AF, Holmans P, Pocklington AJ, et al. Common schizophrenia alleles are enriched in  
332 mutation-intolerant genes and in regions under strong background selection. *Nat Genet.*  
333 2018;50(3):381-389. doi:10.1038/s41588-018-0059-2
- 334 2. Stahl EA, Breen G, Forstner AJ, et al. Genome-wide association study identifies 30 loci associated  
335 with bipolar disorder. *Nat Genet.* 2019;51(5):793-803. doi:10.1038/s41588-019-0397-8
- 336 3. Howard DM, Adams MJ, Clarke T-K, et al. Genome-wide meta-analysis of depression identifies  
337 102 independent variants and highlights the importance of the prefrontal brain regions. *Nat*  
338 *Neurosci.* 2019;22(3):343-352. doi:10.1038/s41593-018-0326-7
- 339 4. Demontis D, Walters RK, Martin J, et al. Discovery of the first genome-wide significant risk loci  
340 for attention deficit/hyperactivity disorder. *Nat Genet.* 2019;51(1):63-75. doi:10.1038/s41588-018-



Roelfs et al. | Phenotypically independent mental health profiles are genetically related

- 341 0269-7
- 342 5. Grove J, Ripke S, Als TD, et al. Identification of common genetic risk variants for autism spectrum  
343 disorder. *Nat Genet.* 2019;51(3):431-444. doi:10.1038/s41588-019-0344-8
- 344 6. Duncan LE, Ratanatharathorn A, Aiello AE, et al. Largest GWAS of PTSD (N=20 070) yields  
345 genetic overlap with schizophrenia and sex differences in heritability. *Mol Psychiatry.*  
346 2018;23(3):666-673. doi:10.1038/mp.2017.77
- 347 7. Otowa T, Hek K, Lee M, et al. Meta-analysis of genome-wide association studies of anxiety  
348 disorders. *Mol Psychiatry.* 2016;21(10):1391-1399. doi:10.1038/mp.2015.197
- 349 8. Andreassen OA, Thompson WK, Schork AJ, et al. Improved detection of common variants  
350 associated with schizophrenia and bipolar disorder using pleiotropy-informed conditional false  
351 discovery rate. *PLoS Genet.* 2013;9(4):e1003455. doi:10.1371/journal.pgen.1003455
- 352 9. Anttila V, Bulik-Sullivan B, Finucane HK, et al. Analysis of shared heritability in common  
353 disorders of the brain. *Science.* 2018;360(6395):eaap8757. doi:10.1126/science.aap8757
- 354 10. Bulik-Sullivan B, Finucane HK, Anttila V, et al. An atlas of genetic correlations across human  
355 diseases and traits. *Nat Genet.* 2015;47(11):1236-1241. doi:10.1038/ng.3406
- 356 11. Smeland OB, Bahrami S, Frei O, et al. Genome-wide analysis reveals extensive genetic overlap  
357 between schizophrenia, bipolar disorder, and intelligence. *Mol Psychiatry.* January  
358 2019;10.1038/s41380-018-0332-x. doi:10.1038/s41380-018-0332-x
- 359 12. Bansal V, Mitjans M, Burik CAP, et al. Genome-wide association study results for educational  
360 attainment aid in identifying genetic heterogeneity of schizophrenia. *Nat Commun.* 2018;9(1):3078.  
361 doi:10.1038/s41467-018-05510-z
- 362 13. Frei O, Holland D, Smeland OB, et al. Bivariate causal mixture model quantifies polygenic overlap  
363 between complex traits beyond genetic correlation. *Nat Commun.* 2019;10(1):2417-2417.  
364 doi:10.1038/s41467-019-10310-0
- 365 14. Bahrami S, Steen NE, Shadrin A, et al. Shared Genetic Loci Between Body Mass Index and Major  
366 Psychiatric Disorders: A Genome-wide Association Study. *JAMA Psychiatry.* January  
367 2020;10.1001/jamapsychiatry.2019.4188. doi:10.1001/jamapsychiatry.2019.4188
- 368 15. Amare AT, Schubert KO, Klingler-Hoffmann M, Cohen-Woods S, Baune BT. The genetic overlap  
369 between mood disorders and cardiometabolic diseases: a systematic review of genome wide and  
370 candidate gene studies. *Transl Psychiatry.* 2017;7(1):e1007-e1007. doi:10.1038/tp.2016.261
- 371 16. Andreasen NC. A unitary model of schizophrenia: Bleuler's "fragmented phrene" as  
372 schizencephaly. *Arch Gen Psychiatry.* 1999;56(9):781-787. doi:10.1001/archpsyc.56.9.781
- 373 17. Craddock N, Owen MJ. The Kraepelinian dichotomy - going, going... but still not gone. *Br J*  
374 *Psychiatry J Ment Sci.* 2010;196(2):92-95. doi:10.1192/bjp.bp.109.073429
- 375 18. Alnaes D, Kaufmann T, van der Meer D, et al. Brain Heterogeneity in Schizophrenia and Its



Roelfs et al. | Phenotypically independent mental health profiles are genetically related

- 376 Association With Polygenic Risk. *JAMA Psychiatry*. 2019;76(7):739-748.  
377 doi:10.1001/jamapsychiatry.2019.0257
- 378 19. Hibar DP, Westlye LT, Doan NT, et al. Cortical abnormalities in bipolar disorder: an MRI analysis  
379 of 6503 individuals from the ENIGMA Bipolar Disorder Working Group. *Mol Psychiatry*.  
380 2018;23(4):932-942. doi:10.1038/mp.2017.73
- 381 20. McGrath JJ, Saha S, Al-Hamzawi A, et al. Psychotic Experiences in the General Population: A  
382 Cross-National Analysis Based on 31,261 Respondents From 18 Countries. *JAMA Psychiatry*.  
383 2015;72(7):697-705. doi:10.1001/jamapsychiatry.2015.0575
- 384 21. Pirastu N, Cordioli M, Nandakumar P, et al. Genetic analyses identify widespread sex-differential  
385 participation bias. *bioRxiv*. January 2020:2020.03.22.001453. doi:10.1101/2020.03.22.001453
- 386 22. Holland D, Frei O, Desikan R, et al. Beyond SNP Heritability: Polygenicity and Discoverability of  
387 Phenotypes Estimated with a Univariate Gaussian Mixture Model. *bioRxiv*. January 2019:133132.  
388 doi:10.1101/133132
- 389 23. Sudlow C, Gallacher J, Allen N, et al. UK biobank: an open access resource for identifying the  
390 causes of a wide range of complex diseases of middle and old age. *PLoS Med*.  
391 2015;12(3):e1001779. doi:10.1371/journal.pmed.1001779
- 392 24. Davis KAS, Coleman JRI, Adams M, et al. Mental health in UK Biobank – development,  
393 implementation and results from an online questionnaire completed by 157 366 participants: a  
394 reanalysis. *BJPsych Open*. 2020;6(2):e18. doi:10.1192/bjo.2019.100
- 395 25. Legge SE, Jones HJ, Kendall KM, et al. Association of Genetic Liability to Psychotic Experiences  
396 With Neuropsychotic Disorders and Traits. *JAMA Psychiatry*. 2019;76(12):1256-1265.  
397 doi:10.1001/jamapsychiatry.2019.2508
- 398 26. Caspi A, Houts RM, Belsky DW, et al. The p Factor: One General Psychopathology Factor in the  
399 Structure of Psychiatric Disorders? *Clin Psychol Sci J Assoc Psychol Sci*. 2014;2(2):119-137.  
400 doi:10.1177/2167702613497473
- 401 27. Jutten C, Héroult J. Détection de grandeurs primitives dans un message composite par une  
402 architecture de calcul neuromimétique en apprentissage non supervisé. *10° Colloq Sur Trait Signal*  
403 *Images FRA 1985*. 1985:1017-1022.
- 404 28. Comon P. Independent component analysis, A new concept? *High Order Stat*. 1994;36(3):287-314.  
405 doi:10.1016/0165-1684(94)90029-9
- 406 29. Alnæs D, Kaufmann T, Doan NT, et al. Association of Heritable Cognitive Ability and  
407 Psychopathology With White Matter Properties in Children and Adolescents. *JAMA Psychiatry*.  
408 2018;75(3):287-295. doi:10.1001/jamapsychiatry.2017.4277
- 409 30. Alberto Franzin, Francesco Sambo, Barbara di Camillo. bnstruct: an R package for Bayesian  
410 Network structure learning in the presence of missing data. *Bioinformatics*. 2017;33(8):1250-1252.

Roelfs et al. | Phenotypically independent mental health profiles are genetically related

- 411 doi:10.1093/bioinformatics/btw807
- 412 31. R Core Team. *R: A Language and Environment for Statistical Computing*. Vienna, Austria: R  
413 Foundation for Statistical Computing; 2017. [www.R-project.org](http://www.R-project.org).
- 414 32. Himberg J, Hyvarinen A. Icasto: software for investigating the reliability of ICA estimates by  
415 clustering and visualization. *2003 IEEE XIII Workshop Neural Netw Signal Process IEEE Cat*  
416 *No03TH8718*. 2003:259-268. doi:10.1109/NNSP.2003.1318025
- 417 33. Marchini J, Heaton C, Ripley B. *FastICA: FastICA Algorithms to Perform ICA and Projection*  
418 *Pursuit.*; 2019. <https://CRAN.R-project.org/package=fastICA>.
- 419 34. Chang CC, Chow CC, Tellier LC, Vattikuti S, Purcell SM, Lee JJ. Second-generation PLINK:  
420 rising to the challenge of larger and richer datasets. *Gigascience*. 2015;4:7. doi:10.1186/s13742-  
421 015-0047-8
- 422 35. Purcell S, Neale B, Todd-Brown K, et al. PLINK: a tool set for whole-genome association and  
423 population-based linkage analyses. *Am J Hum Genet*. 2007;81(3):559-575. doi:10.1086/519795
- 424 36. Bulik-Sullivan BK, Loh PR, Finucane HK, et al. LD Score regression distinguishes confounding  
425 from polygenicity in genome-wide association studies. *Nat Genet*. 2015;47(3):291-295.  
426 doi:10.1038/ng.3211
- 427 37. Wray NR, Ripke S, Mattheisen M, et al. Genome-wide association analyses identify 44 risk variants  
428 and refine the genetic architecture of major depression. *Nat Genet*. 2018;50(5):668-681.  
429 doi:10.1038/s41588-018-0090-3
- 430 38. Savage JE, Jansen PR, Stringer S, et al. Genome-wide association meta-analysis in 269,867  
431 individuals identifies new genetic and functional links to intelligence. *Nat Genet*. 2018;50(7):912-  
432 919. doi:10.1038/s41588-018-0152-6
- 433 39. Lee JJ, Wedow R, Okbay A, et al. Gene discovery and polygenic prediction from a genome-wide  
434 association study of educational attainment in 1.1 million individuals. *Nat Genet*. 2018;50(8):1112-  
435 1121. doi:10.1038/s41588-018-0147-3
- 436 40. Finucane HK, Bulik-Sullivan B, Gusev A, et al. Partitioning heritability by functional annotation  
437 using genome-wide association summary statistics. *Nat Genet*. 2015;47(11):1228-1235.  
438 doi:10.1038/ng.3404
- 439 41. Watanabe K, Taskesen E, van Bochoven A, Posthuma D. Functional mapping and annotation of  
440 genetic associations with FUMA. *Nat Commun*. 2017;8(1):1826. doi:10.1038/s41467-017-01261-5

441  
442 **Supplementary Tables**  
443

Roelfs et al. | Phenotypically independent mental health profiles are genetically related

| no | question                                                                                                                                                                                                                                   | coding |
|----|--------------------------------------------------------------------------------------------------------------------------------------------------------------------------------------------------------------------------------------------|--------|
| 1  | In your life, did you seek or receive help from a professional (medical doctor, psychologist, social worker, counsellor, nurse, clergy, or other helping professional) for mental distress, psychological problems or unusual experiences? | 502    |
| 2  | In your life, have you suffered from a period of mental distress that prevented you from doing your usual activities?                                                                                                                      | 502    |
| 3  | Have you ever had a time in your life lasting two weeks or more when you lost interest in most things like hobbies, work, or activities that usually give you pleasure?                                                                    | 503    |
| 4  | Have you ever had a time in your life when you felt sad, blue, or depressed for two weeks or more in a row?                                                                                                                                | 503    |
| 5  | Have you ever had a period of time when you were feeling so good, high, excited, or hyper that other people thought you were not your normal self or you were so hyper that you got into trouble?                                          | 502    |
| 6  | Have you ever had a period of time when you were so irritable that you found yourself shouting at people or starting fights or arguments?                                                                                                  | 502    |
| 7  | Have you ever had a period lasting one month or longer when most of the time you felt worried, tense, or anxious?                                                                                                                          | 502    |
| 8  | Have you been addicted to or dependent on one or more things, including substances (not cigarettes/coffee) or behaviours (such as gambling)?                                                                                               | 502    |
| 9  | In the next two questions, a drink is defined as one unit of alcohol. How many drinks containing alcohol do you have on a typical day when you are drinking?                                                                               | 522    |
| 10 | Has a relative or friend or a doctor or another health worker been concerned about your drinking or suggested you cut down?                                                                                                                | 524    |
| 11 | Have you or someone else been injured as a result of your drinking?                                                                                                                                                                        | 524    |
| 12 | How often do you have a drink containing alcohol?                                                                                                                                                                                          | 521    |
| 13 | In the next two questions, a drink is defined as one unit of alcohol. How often do you have six or more drinks on one occasion?                                                                                                            | 523    |
| 14 | Have you taken CANNABIS (marijuana, grass, hash, ganja, blow, draw, skunk, weed, spliff, dope), even if it was a long time ago?                                                                                                            | 526    |
| 15 | Did you ever hear things that other people said did not exist, like strange voices coming from inside your head talking to you or about you, or voices coming out of the air when there was no one around?                                 | 502    |

Roelfs et al. | Phenotypically independent mental health profiles are genetically related

| no | question                                                                                                                                                                                                                                                                                            | coding |
|----|-----------------------------------------------------------------------------------------------------------------------------------------------------------------------------------------------------------------------------------------------------------------------------------------------------|--------|
| 16 | Did you ever believe that there was an unjust plot going on to harm you or to have people follow you, and which your family and friends did not believe existed?                                                                                                                                    | 502    |
| 17 | Did you ever see something that wasn't really there that other people could not see?                                                                                                                                                                                                                | 502    |
| 18 | Did you ever believe that a strange force was trying to communicate directly with you by sending special signs or signals that you could understand but that no one else could understand (for example through the radio or television)?                                                            | 502    |
| 19 | When I was growing up... I felt that someone in my family hated me                                                                                                                                                                                                                                  | 532    |
| 20 | When I was growing up... People in my family hit me so hard that it left me with bruises or marks                                                                                                                                                                                                   | 532    |
| 21 | When I was growing up... I felt loved                                                                                                                                                                                                                                                               | 532    |
| 22 | When I was growing up... Someone molested me (sexually)                                                                                                                                                                                                                                             | 532    |
| 23 | When I was growing up... There was someone to take me to the doctor if I needed it                                                                                                                                                                                                                  | 532    |
| 24 | Next is a list of problems and complaints that people sometimes have in response to such extremely stressful experiences. Please indicate how much you have been bothered by that problem in the past month: Avoiding activities or situations because they reminded you of a stressful experience? | 534    |
| 25 | Next is a list of problems and complaints that people sometimes have in response to such extremely stressful experiences. Please indicate how much you have been bothered by that problem in the past month: Repeated, disturbing memories, thoughts, or images of a stressful experience?          | 534    |
| 26 | Next is a list of problems and complaints that people sometimes have in response to such extremely stressful experiences. Please indicate how much you have been bothered by that problem in the past month: Feeling very upset when something reminded you of a stressful experience?              | 534    |
| 27 | Since I was sixteen... A partner or ex-partner repeatedly belittled me to the extent that I felt worthless                                                                                                                                                                                          | 532    |
| 28 | Since I was sixteen... I have been in a confiding relationship                                                                                                                                                                                                                                      | 532    |
| 29 | Since I was sixteen... A partner or ex-partner deliberately hit me or used violence in any other way                                                                                                                                                                                                | 532    |
| 30 | Since I was sixteen... A partner or ex-partner sexually interfered with me, or forced me to have sex against my wishes                                                                                                                                                                              | 532    |
| 31 | Since I was sixteen... There was money to pay the rent or mortgage when I needed it                                                                                                                                                                                                                 | 532    |

Roelfs et al. | Phenotypically independent mental health profiles are genetically related

| no | question                                                                                                              | coding |
|----|-----------------------------------------------------------------------------------------------------------------------|--------|
| 32 | In your life, have you...? Been in a serious accident that you believed to be life-threatening at the time            | 533    |
| 33 | In your life, have you...? Been involved in combat or exposed to a war-zone (either in the military or as a civilian) | 533    |
| 34 | In your life, have you...? Been diagnosed with a life-threatening illness                                             | 533    |
| 35 | In your life, have you...? Been attacked, mugged, robbed, or been the victim of a physically violent crime            | 533    |
| 36 | In your life, have you...? Witnessed a sudden violent death (eg. murder, suicide, aftermath of an accident)           | 533    |
| 37 | In your life, have you...? Been a victim of a sexual assault, whether by a stranger or someone you knew               | 533    |
| 38 | Many people have thoughts that life is not worth living. Have you felt that way?                                      | 535    |
| 39 | Have you deliberately harmed yourself, whether or not you meant to end your life?                                     | 503    |
| 40 | Have you contemplated harming yourself (for example by cutting, biting, hitting yourself or taking an overdose)?      | 535    |
| 41 | In general how happy are you?                                                                                         | 537    |
| 42 | In general how happy are you with your HEALTH?                                                                        | 537    |
| 43 | To what extent do you feel your life to be meaningful?                                                                | 538    |

Roelfs et al. | Phenotypically independent mental health profiles are genetically related

| no                                                                                                                                                                                                                                                                                                                                                                      | question                                                                                                                             | coding |
|-------------------------------------------------------------------------------------------------------------------------------------------------------------------------------------------------------------------------------------------------------------------------------------------------------------------------------------------------------------------------|--------------------------------------------------------------------------------------------------------------------------------------|--------|
| <b>Suppl. Table 1. Full list of questions</b> This table lists the questions included in this study as presented to the participant. Data was available from 157,352 individuals, but through exclusion criteria 136,678 individuals remained. There are in total 43 questions. The third column indicates the coding. Possible answers for each coding are as follows: |                                                                                                                                      |        |
|                                                                                                                                                                                                                                                                                                                                                                         | 502 – Prefer not to answer/Do not know/No/Yes                                                                                        |        |
|                                                                                                                                                                                                                                                                                                                                                                         | 503 – Prefer not to answer/No/Yes                                                                                                    |        |
|                                                                                                                                                                                                                                                                                                                                                                         | 521 – Prefer not to answer/Never/Monthly or less/2 to 4 times a month/2 to 3 times a month/4 or more times a week                    |        |
|                                                                                                                                                                                                                                                                                                                                                                         | 522 – Prefer not to answer/1 or 2/3 or 4/5 or 6/7,8 or 9/10 or more                                                                  |        |
|                                                                                                                                                                                                                                                                                                                                                                         | 523 – Prefer not to answer/Never/Less than monthly/Monthly/Weekly/Daily or almost daily                                              |        |
|                                                                                                                                                                                                                                                                                                                                                                         | 524 – Prefer not to answer/Yes, but not in the last year/Yes, during the last year                                                   |        |
|                                                                                                                                                                                                                                                                                                                                                                         | 526 – Prefer not to answer/No/Yes, 1-2 times/Yes, 3-10 times/Yes, 11-100 times/Yes, more than 100 times                              |        |
|                                                                                                                                                                                                                                                                                                                                                                         | 532 – Prefer not to answer/Never true/Rarely true/Sometimes true/Often/Very often true                                               |        |
|                                                                                                                                                                                                                                                                                                                                                                         | 533 – Prefer not to answer/Never/Yes, but not in the last 12 months/Yes, within the last 12 months                                   |        |
|                                                                                                                                                                                                                                                                                                                                                                         | 534 – Prefer not to answer/Not at all/A little bit/Moderately/Quite a bit/Extremely                                                  |        |
|                                                                                                                                                                                                                                                                                                                                                                         | 535 – Prefer not to answer/No/Yes, once/Yes, more than once                                                                          |        |
|                                                                                                                                                                                                                                                                                                                                                                         | 537 – Prefer not to answer/Do not know/Extremely happy/Very happy/Moderately happy/Moderately unhappy/Very unhappy/Extremely unhappy |        |
|                                                                                                                                                                                                                                                                                                                                                                         | 538 – Prefer not to answer/Do not know/Not at all/A little/A moderate amount/Very much/An extreme amount                             |        |

444

| Phenotype                                                                                            | Consortium  | Sample   | Citation              | n <sub>case</sub> | n <sub>control</sub> |
|------------------------------------------------------------------------------------------------------|-------------|----------|-----------------------|-------------------|----------------------|
| SCZ                                                                                                  | PGC         | Meta     | Pardiñas et al., 2018 | 40,675            | 64,643               |
| BD                                                                                                   | PGC         | European | Stahl et al., 2019    | 20,352            | 31,358               |
| MDD                                                                                                  | PGC         | European | Wray et al., 2018     | 69,576            | 161,613              |
| ADHD                                                                                                 | PGC         | European | Demontis et al., 2019 | 19,099            | 34,194               |
| ASD                                                                                                  | PGC, iPSYCH | Meta     | Grove et al., 2019    | 18,381            | 27,969               |
| PTSD                                                                                                 | PGC         | European | Duncan et al., 2018   | 2,424             | 7,113                |
| ANX                                                                                                  | ANGST       | Meta     | Otowa et al., 2016    | 7,016             | 14,745               |
| Intelligence                                                                                         | CTG         | Meta     | Savage et al., 2018   | 269,867           |                      |
| Educational attainment                                                                               | SSGAC       | European | Lee et al., 2018      | 766,345           |                      |
| <b>Suppl. Table 2. Cohort Overview</b> Overview of the cohorts including references and sample size. |             |          |                       |                   |                      |

445

Roelfs et al. | Phenotypically independent mental health profiles are genetically related

446

| IC   | Component represents                    | h <sup>2</sup> (SE) | Lambda GC | Intercept (SE)  |
|------|-----------------------------------------|---------------------|-----------|-----------------|
| IC1  | Sexual abuse                            | 0.0252 (0.0043)     | 1.0557    | 1.0023 (0.0063) |
| IC2  | Psychosis                               | 0.0089 (0.0043)     | 1.0225    | 1.0034 (0.007)  |
| IC3  | Anxiety/depression/mental distress      | 0.0744 (0.0052)     | 1.1523    | 0.9993 (0.0074) |
| IC4  | Diagnosed with life-threatening illness | 0.0181 (0.0041)     | 1.0557    | 1.0103 (0.0066) |
| IC5  | Social instability                      | 0.046 (0.0049)      | 1.0988    | 1.0138 (0.0067) |
| IC6  | Traumatic experiences                   | 0.0313 (0.0041)     | 1.0649    | 1.0021 (0.0065) |
| IC7  | Stress last month                       | 0.0287 (0.0046)     | 1.0557    | 0.9978 (0.0068) |
| IC8  | Felt loved                              | 0.0588 (0.005)      | 1.1301    | 1.0058 (0.0067) |
| IC9  | Self-harm                               | 0.0339 (0.0044)     | 1.0741    | 1.0017 (0.0059) |
| IC10 | General happiness                       | 0.0672 (0.0052)     | 1.1555    | 1.0239 (0.0074) |
| IC11 | Addiction/mania                         | 0.0259 (0.0043)     | 1.0710    | 1.0085 (0.0062) |
| IC12 | Emotional abuse                         | 0.0243 (0.0044)     | 1.0527    | 0.996 (0.0062)  |
| IC13 | Alcohol abuse                           | 0.0763 (0.0055)     | 1.1587    | 1.0055 (0.0074) |

**Suppl. Table 3. Heritability statistics from LDSC** Heritability estimates and additional statistics on the ICs

447

| IC  | Component represents | no | Gene          | Chr | pmin        | Individual SNP | Significant |
|-----|----------------------|----|---------------|-----|-------------|----------------|-------------|
| IC1 | Sexual abuse         | 1  | ADARB2        | 10  | 3.74966e-08 | rs554213191    |             |
| IC1 | Sexual abuse         | 2  | ADARB2        | 10  | 3.74966e-08 | rs554213191    |             |
| IC2 | Psychosis            | 1  | GAS2L3        | 12  | 4.49537e-08 | rs540594149    |             |
| IC2 | Psychosis            | 2  | ANO4          | 12  | 7.47504e-07 | rs540594149    |             |
| IC2 | Psychosis            | 3  | FAM109A       | 12  | 1.14947e-06 | rs749014627    |             |
| IC2 | Psychosis            | 4  | SH2B3         | 12  | 5.60159e-07 | rs749014627    |             |
| IC2 | Psychosis            | 5  | ATXN2         | 12  | 5.60159e-07 | rs749014627    |             |
| IC2 | Psychosis            | 6  | ACAD10        | 12  | 1.24816e-06 | rs749014627    |             |
| IC2 | Psychosis            | 7  | RP11-162P23.2 | 12  | 1.24816e-06 | rs749014627    |             |
| IC2 | Psychosis            | 8  | ALDH2         | 12  | 1.32971e-06 | rs749014627    |             |
| IC2 | Psychosis            | 9  | MAPKAPK5      | 12  | 5.77870e-07 | rs749014627    |             |
| IC2 | Psychosis            | 10 | TMEM116       | 12  | 1.19305e-05 | rs749014627    |             |
| IC2 | Psychosis            | 11 | HECTD4        | 12  | 4.04123e-06 | rs749014627    |             |



Roelfs et al. | Phenotypically independent mental health profiles are genetically related

| IC  | Component represents               | no | Gene          | Chr | pmin        | Individual SNP | Significant |
|-----|------------------------------------|----|---------------|-----|-------------|----------------|-------------|
| IC2 | Psychosis                          | 12 | GAS2L3        | 12  | 4.49537e-08 | rs540594149    |             |
| IC2 | Psychosis                          | 13 | ANO4          | 12  | 7.47504e-07 | rs540594149    |             |
| IC2 | Psychosis                          | 14 | FAM109A       | 12  | 1.14947e-06 | rs749014627    |             |
| IC2 | Psychosis                          | 15 | SH2B3         | 12  | 5.60159e-07 | rs749014627    |             |
| IC2 | Psychosis                          | 16 | ATXN2         | 12  | 5.60159e-07 | rs749014627    |             |
| IC2 | Psychosis                          | 17 | ACAD10        | 12  | 1.24816e-06 | rs749014627    |             |
| IC2 | Psychosis                          | 18 | RP11-162P23.2 | 12  | 1.24816e-06 | rs749014627    |             |
| IC2 | Psychosis                          | 19 | ALDH2         | 12  | 1.32971e-06 | rs749014627    |             |
| IC2 | Psychosis                          | 20 | MAPKAPK5      | 12  | 5.77870e-07 | rs749014627    |             |
| IC2 | Psychosis                          | 21 | TMEM116       | 12  | 1.19305e-05 | rs749014627    |             |
| IC2 | Psychosis                          | 22 | HECTD4        | 12  | 4.04123e-06 | rs749014627    |             |
| IC3 | Anxiety/depression/mental distress | 1  | CABP1         | 12  | 4.21106e-09 | rs73222787     |             |
| IC3 | Anxiety/depression/mental distress | 2  | MLEC          | 12  | 1.62854e-06 | rs73222787     |             |
| IC3 | Anxiety/depression/mental distress | 3  | UNC119B       | 12  | 2.60327e-06 | rs73222787     |             |
| IC3 | Anxiety/depression/mental distress | 4  | ACADS         | 12  | 1.64855e-06 | rs73222787     |             |
| IC3 | Anxiety/depression/mental distress | 5  | SPPL3         | 12  | 2.82900e-06 | rs73222787     |             |
| IC3 | Anxiety/depression/mental distress | 6  | CABP1         | 12  | 4.21106e-09 | rs73222787     |             |
| IC3 | Anxiety/depression/mental distress | 7  | MLEC          | 12  | 1.62854e-06 | rs73222787     |             |
| IC3 | Anxiety/depression/mental distress | 8  | UNC119B       | 12  | 2.60327e-06 | rs73222787     |             |
| IC3 | Anxiety/depression/mental distress | 9  | ACADS         | 12  | 1.64855e-06 | rs73222787     |             |
| IC3 | Anxiety/depression/mental distress | 10 | SPPL3         | 12  | 2.82900e-06 | rs73222787     |             |
| IC5 | Social instability                 | 1  | AP1G1         | 16  | 3.00910e-06 | rs8057124      |             |
| IC5 | Social instability                 | 2  | ATXN1L        | 16  | 1.83621e-08 | rs8057124      |             |
| IC5 | Social instability                 | 3  | IST1          | 16  | 1.04493e-08 | rs8057124      |             |
| IC5 | Social instability                 | 4  | ZNF821        | 16  | 2.05589e-08 | rs8057124      |             |
| IC5 | Social instability                 | 5  | AP1G1         | 16  | 3.00910e-06 | rs8057124      |             |
| IC5 | Social instability                 | 6  | ATXN1L        | 16  | 1.83621e-08 | rs8057124      |             |
| IC5 | Social instability                 | 7  | IST1          | 16  | 1.04493e-08 | rs8057124      |             |
| IC5 | Social instability                 | 8  | ZNF821        | 16  | 2.05589e-08 | rs8057124      |             |
| IC7 | Stress last month                  | 1  | ACTN1         | 14  | 1.10472e-05 | rs761897       |             |
| IC7 | Stress last month                  | 2  | ACTN1         | 14  | 1.10472e-05 | rs761897       |             |

Roelfs et al. | Phenotypically independent mental health profiles are genetically related

| IC   | Component represents | no | Gene       | Chr | pmin        | Individual SNP                                      | Significant |
|------|----------------------|----|------------|-----|-------------|-----------------------------------------------------|-------------|
| IC8  | Felt loved           | 1  | EYS        | 6   | 4.70962e-08 | rs183356400                                         |             |
| IC8  | Felt loved           | 2  | RBFOX1     | 16  | 4.39126e-08 | rs13332228                                          |             |
| IC8  | Felt loved           | 3  | EYS        | 6   | 4.70962e-08 | rs183356400                                         |             |
| IC8  | Felt loved           | 4  | RBFOX1     | 16  | 4.39126e-08 | rs13332228                                          |             |
| IC10 | General happiness    | 1  | CSMD1      | 8   | 4.77632e-08 | rs2554644                                           |             |
| IC10 | General happiness    | 2  | CSMD1      | 8   | 4.77632e-08 | rs2554644                                           |             |
| IC11 | Addiction/mania      | 1  | CADM2      | 3   | 3.68665e-08 | rs9866089                                           |             |
| IC11 | Addiction/mania      | 2  | CADM2      | 3   | 3.68665e-08 | rs9866089                                           |             |
| IC12 | Emotional abuse      | 1  | PTPRT      | 20  | 1.63897e-08 | rs533568724                                         |             |
| IC12 | Emotional abuse      | 2  | PTPRT      | 20  | 1.63897e-08 | rs533568724                                         |             |
| IC13 | Alcohol abuse        | 1  | EIF2B4     | 2   | 2.34369e-08 | rs1260326                                           |             |
| IC13 | Alcohol abuse        | 2  | SNX17      | 2   | 2.34369e-08 | rs1260326                                           |             |
| IC13 | Alcohol abuse        | 3  | ZNF513     | 2   | 2.34369e-08 | rs1260326                                           |             |
| IC13 | Alcohol abuse        | 4  | PPM1G      | 2   | 2.34369e-08 | rs1260326                                           |             |
| IC13 | Alcohol abuse        | 5  | GCKR       | 2   | 1.70337e-10 | rs1260326                                           |             |
| IC13 | Alcohol abuse        | 6  | AC109829.1 | 2   | 1.16193e-05 | rs1260326                                           |             |
| IC13 | Alcohol abuse        | 7  | SIX3       | 2   | 2.32692e-07 | rs528301<br>rs504675                                |             |
| IC13 | Alcohol abuse        | 8  | RFC1       | 4   | 4.44299e-08 | rs12643682                                          |             |
| IC13 | Alcohol abuse        | 9  | KLB        | 4   | 8.52705e-17 | rs12643682<br>rs58015370<br>rs13125440<br>rs6836420 |             |
| IC13 | Alcohol abuse        | 10 | TSPAN5     | 4   | 4.55114e-10 | rs4699663                                           |             |
| IC13 | Alcohol abuse        | 11 | METAP1     | 4   | 1.26232e-13 | rs146788033                                         |             |
| IC13 | Alcohol abuse        | 12 | ADH5       | 4   | 3.35425e-25 | rs145452708                                         |             |
| IC13 | Alcohol abuse        | 13 | ADH6       | 4   | 1.73597e-16 | rs11733695                                          |             |
| IC13 | Alcohol abuse        | 14 | ADH1B      | 4   | 5.89840e-52 | rs1229984<br>rs145452708                            |             |
| IC13 | Alcohol abuse        | 15 | C4orf17    | 4   | 5.76240e-15 | rs543669349                                         |             |
| IC13 | Alcohol abuse        | 16 | TRMT10A    | 4   | 5.76240e-15 | rs543669349                                         |             |

Roelfs et al. | Phenotypically independent mental health profiles are genetically related

| IC   | Component represents | no | Gene     | Chr | pmin        | Individual SNP                                      | Significant |
|------|----------------------|----|----------|-----|-------------|-----------------------------------------------------|-------------|
| IC13 | Alcohol abuse        | 17 | DAPP1    | 4   | NA          | rs543669349<br>rs188514326                          |             |
| IC13 | Alcohol abuse        | 18 | LAMTOR3  | 4   | NA          | rs543669349<br>rs188514326                          |             |
| IC13 | Alcohol abuse        | 19 | DNAJB14  | 4   | 8.67314e-10 | rs543669349<br>rs188514326                          |             |
| IC13 | Alcohol abuse        | 20 | BANK1    | 4   | 6.49446e-08 | rs13107325                                          |             |
| IC13 | Alcohol abuse        | 21 | SLC39A8  | 4   | 1.26159e-13 | rs13107325<br>rs34333163                            |             |
| IC13 | Alcohol abuse        | 22 | ARHGAP27 | 17  | 4.06505e-09 | rs62062288                                          |             |
| IC13 | Alcohol abuse        | 23 | PLEKHM1  | 17  | 1.02001e-13 | rs62062288<br>rs62053943                            |             |
| IC13 | Alcohol abuse        | 24 | CRHR1    | 17  | 1.00879e-13 | rs62062288<br>rs62053943<br>rs9303521<br>rs12944712 |             |
| IC13 | Alcohol abuse        | 25 | SPPL2C   | 17  | 1.27409e-13 | rs62062288<br>rs62053943<br>rs12944712              |             |
| IC13 | Alcohol abuse        | 26 | MAPT     | 17  | 2.31437e-14 | rs62062288<br>rs62053943                            |             |
| IC13 | Alcohol abuse        | 27 | STH      | 17  | 1.94674e-13 | rs62062288<br>rs62053943                            |             |
| IC13 | Alcohol abuse        | 28 | KANSL1   | 17  | 5.27802e-14 | rs62062288<br>rs62053943                            |             |
| IC13 | Alcohol abuse        | 29 | ARL17B   | 17  | 1.06779e-13 | rs62062288<br>rs62053943                            |             |
| IC13 | Alcohol abuse        | 30 | LRRC37A  | 17  | 1.06779e-13 | rs62062288<br>rs62053943                            |             |
| IC13 | Alcohol abuse        | 31 | NSF      | 17  | 9.06747e-13 | rs62062288<br>rs62053943                            |             |

Roelfs et al. | Phenotypically independent mental health profiles are genetically related

| IC   | Component represents | no | Gene       | Chr | pmin        | Individual SNP                                      | Significant |
|------|----------------------|----|------------|-----|-------------|-----------------------------------------------------|-------------|
| IC13 | Alcohol abuse        | 32 | WNT3       | 17  | 7.33108e-12 | rs62062288                                          |             |
| IC13 | Alcohol abuse        | 33 | FUT2       | 19  | 2.24286e-08 | rs28894750                                          |             |
| IC13 | Alcohol abuse        | 34 | MAMSTR     | 19  | 2.24286e-08 | rs28894750                                          |             |
| IC13 | Alcohol abuse        | 35 | RASIP1     | 19  | 4.60338e-08 | rs28894750                                          |             |
| IC13 | Alcohol abuse        | 36 | IZUMO1     | 19  | 2.76726e-06 | rs28894750                                          |             |
| IC13 | Alcohol abuse        | 37 | FUT1       | 19  | 2.76726e-06 | rs28894750                                          |             |
| IC13 | Alcohol abuse        | 38 | EIF2B4     | 2   | 2.34369e-08 | rs1260326                                           |             |
| IC13 | Alcohol abuse        | 39 | SNX17      | 2   | 2.34369e-08 | rs1260326                                           |             |
| IC13 | Alcohol abuse        | 40 | ZNF513     | 2   | 2.34369e-08 | rs1260326                                           |             |
| IC13 | Alcohol abuse        | 41 | PPM1G      | 2   | 2.34369e-08 | rs1260326                                           |             |
| IC13 | Alcohol abuse        | 42 | GCKR       | 2   | 1.70337e-10 | rs1260326                                           |             |
| IC13 | Alcohol abuse        | 43 | AC109829.1 | 2   | 1.16193e-05 | rs1260326                                           |             |
| IC13 | Alcohol abuse        | 44 | SIX3       | 2   | 2.32692e-07 | rs528301<br>rs504675                                |             |
| IC13 | Alcohol abuse        | 45 | RFC1       | 4   | 4.44299e-08 | rs12643682                                          |             |
| IC13 | Alcohol abuse        | 46 | KLB        | 4   | 8.52705e-17 | rs12643682<br>rs58015370<br>rs13125440<br>rs6836420 |             |
| IC13 | Alcohol abuse        | 47 | TSPAN5     | 4   | 4.55114e-10 | rs4699663                                           |             |
| IC13 | Alcohol abuse        | 48 | METAP1     | 4   | 1.26232e-13 | rs146788033                                         |             |
| IC13 | Alcohol abuse        | 49 | ADH5       | 4   | 3.35425e-25 | rs145452708                                         |             |
| IC13 | Alcohol abuse        | 50 | ADH6       | 4   | 1.73597e-16 | rs11733695                                          |             |
| IC13 | Alcohol abuse        | 51 | ADH1B      | 4   | 5.89840e-52 | rs1229984<br>rs145452708                            |             |
| IC13 | Alcohol abuse        | 52 | C4orf17    | 4   | 5.76240e-15 | rs543669349                                         |             |
| IC13 | Alcohol abuse        | 53 | TRMT10A    | 4   | 5.76240e-15 | rs543669349                                         |             |
| IC13 | Alcohol abuse        | 54 | DAPP1      | 4   | NA          | rs543669349<br>rs188514326                          |             |
| IC13 | Alcohol abuse        | 55 | LAMTOR3    | 4   | NA          | rs543669349<br>rs188514326                          |             |

Roelfs et al. | Phenotypically independent mental health profiles are genetically related

| IC   | Component represents | no | Gene     | Chr | pmin        | Individual SNP                                      | Significant |
|------|----------------------|----|----------|-----|-------------|-----------------------------------------------------|-------------|
| IC13 | Alcohol abuse        | 56 | DNAJB14  | 4   | 8.67314e-10 | rs543669349<br>rs188514326                          |             |
| IC13 | Alcohol abuse        | 57 | BANK1    | 4   | 6.49446e-08 | rs13107325                                          |             |
| IC13 | Alcohol abuse        | 58 | SLC39A8  | 4   | 1.26159e-13 | rs13107325<br>rs34333163                            |             |
| IC13 | Alcohol abuse        | 59 | ARHGAP27 | 17  | 4.06505e-09 | rs62062288                                          |             |
| IC13 | Alcohol abuse        | 60 | PLEKHM1  | 17  | 1.02001e-13 | rs62062288<br>rs62053943                            |             |
| IC13 | Alcohol abuse        | 61 | CRHR1    | 17  | 1.00879e-13 | rs62062288<br>rs62053943<br>rs9303521<br>rs12944712 |             |
| IC13 | Alcohol abuse        | 62 | SPPL2C   | 17  | 1.27409e-13 | rs62062288<br>rs62053943<br>rs12944712              |             |
| IC13 | Alcohol abuse        | 63 | MAPT     | 17  | 2.31437e-14 | rs62062288<br>rs62053943                            |             |
| IC13 | Alcohol abuse        | 64 | STH      | 17  | 1.94674e-13 | rs62062288<br>rs62053943                            |             |
| IC13 | Alcohol abuse        | 65 | KANSL1   | 17  | 5.27802e-14 | rs62062288<br>rs62053943                            |             |
| IC13 | Alcohol abuse        | 66 | ARL17B   | 17  | 1.06779e-13 | rs62062288<br>rs62053943                            |             |
| IC13 | Alcohol abuse        | 67 | LRRC37A  | 17  | 1.06779e-13 | rs62062288<br>rs62053943                            |             |
| IC13 | Alcohol abuse        | 68 | NSF      | 17  | 9.06747e-13 | rs62062288<br>rs62053943                            |             |
| IC13 | Alcohol abuse        | 69 | WNT3     | 17  | 7.33108e-12 | rs62062288                                          |             |
| IC13 | Alcohol abuse        | 70 | FUT2     | 19  | 2.24286e-08 | rs28894750                                          |             |
| IC13 | Alcohol abuse        | 71 | MAMSTR   | 19  | 2.24286e-08 | rs28894750                                          |             |
| IC13 | Alcohol abuse        | 72 | RASIP1   | 19  | 4.60338e-08 | rs28894750                                          |             |

Roelfs et al. | Phenotypically independent mental health profiles are genetically related

| IC   | Component represents | no | Gene   | Chr | pmin        | Individual Significant SNP |
|------|----------------------|----|--------|-----|-------------|----------------------------|
| IC13 | Alcohol abuse        | 73 | IZUMO1 | 19  | 2.76726e-06 | rs28894750                 |
| IC13 | Alcohol abuse        | 74 | FUT1   | 19  | 2.76726e-06 | rs28894750                 |

**Suppl. Table 4. Mapped genes from FUMA** This table shows the mapped genes and individual lead SNPs as provided by FUMA.

448

449 **Supplementary Figures**

450

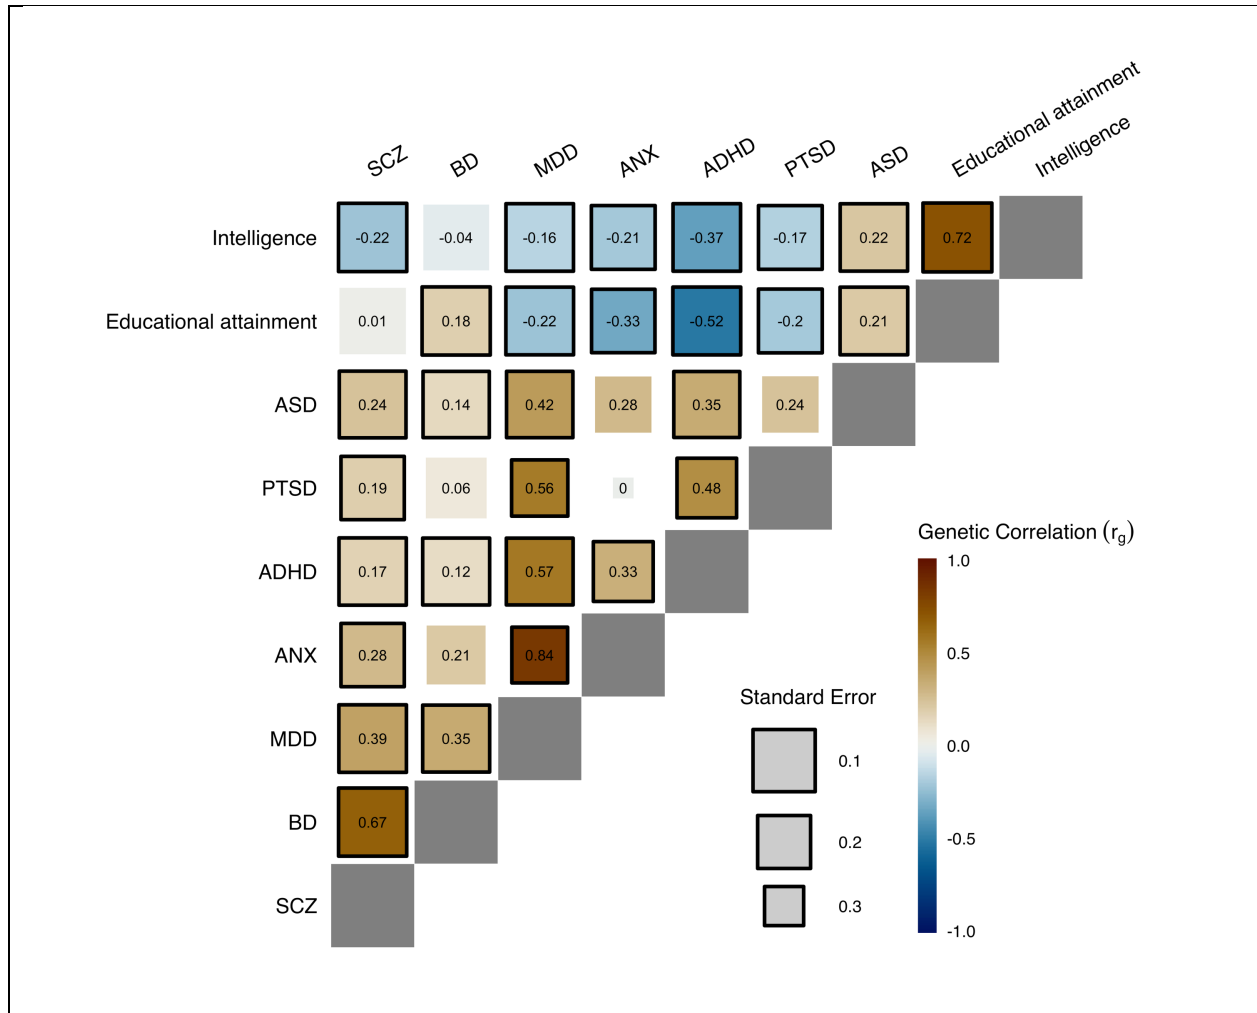

**Suppl. Fig. 1. Genetic correlation between the disorders and cognitive traits** Numbers inside the boxes denote correlation ( $r_g$ ). Size of the boxes reflect standard error. Significant correlations ( $p < FDR$ ) are indicated with a black border. In line with previous reports<sup>9,25</sup>, the weakest correlation was between PTSD and ANX ( $r_g = -0.004$ ,  $SE = 0.3408$ ) and the strongest between ANX and MDD ( $r_g = 0.8441$ ,  $SE = 0.1724$ ).

451



Roelfs et al. | Phenotypically independent mental health profiles are genetically related

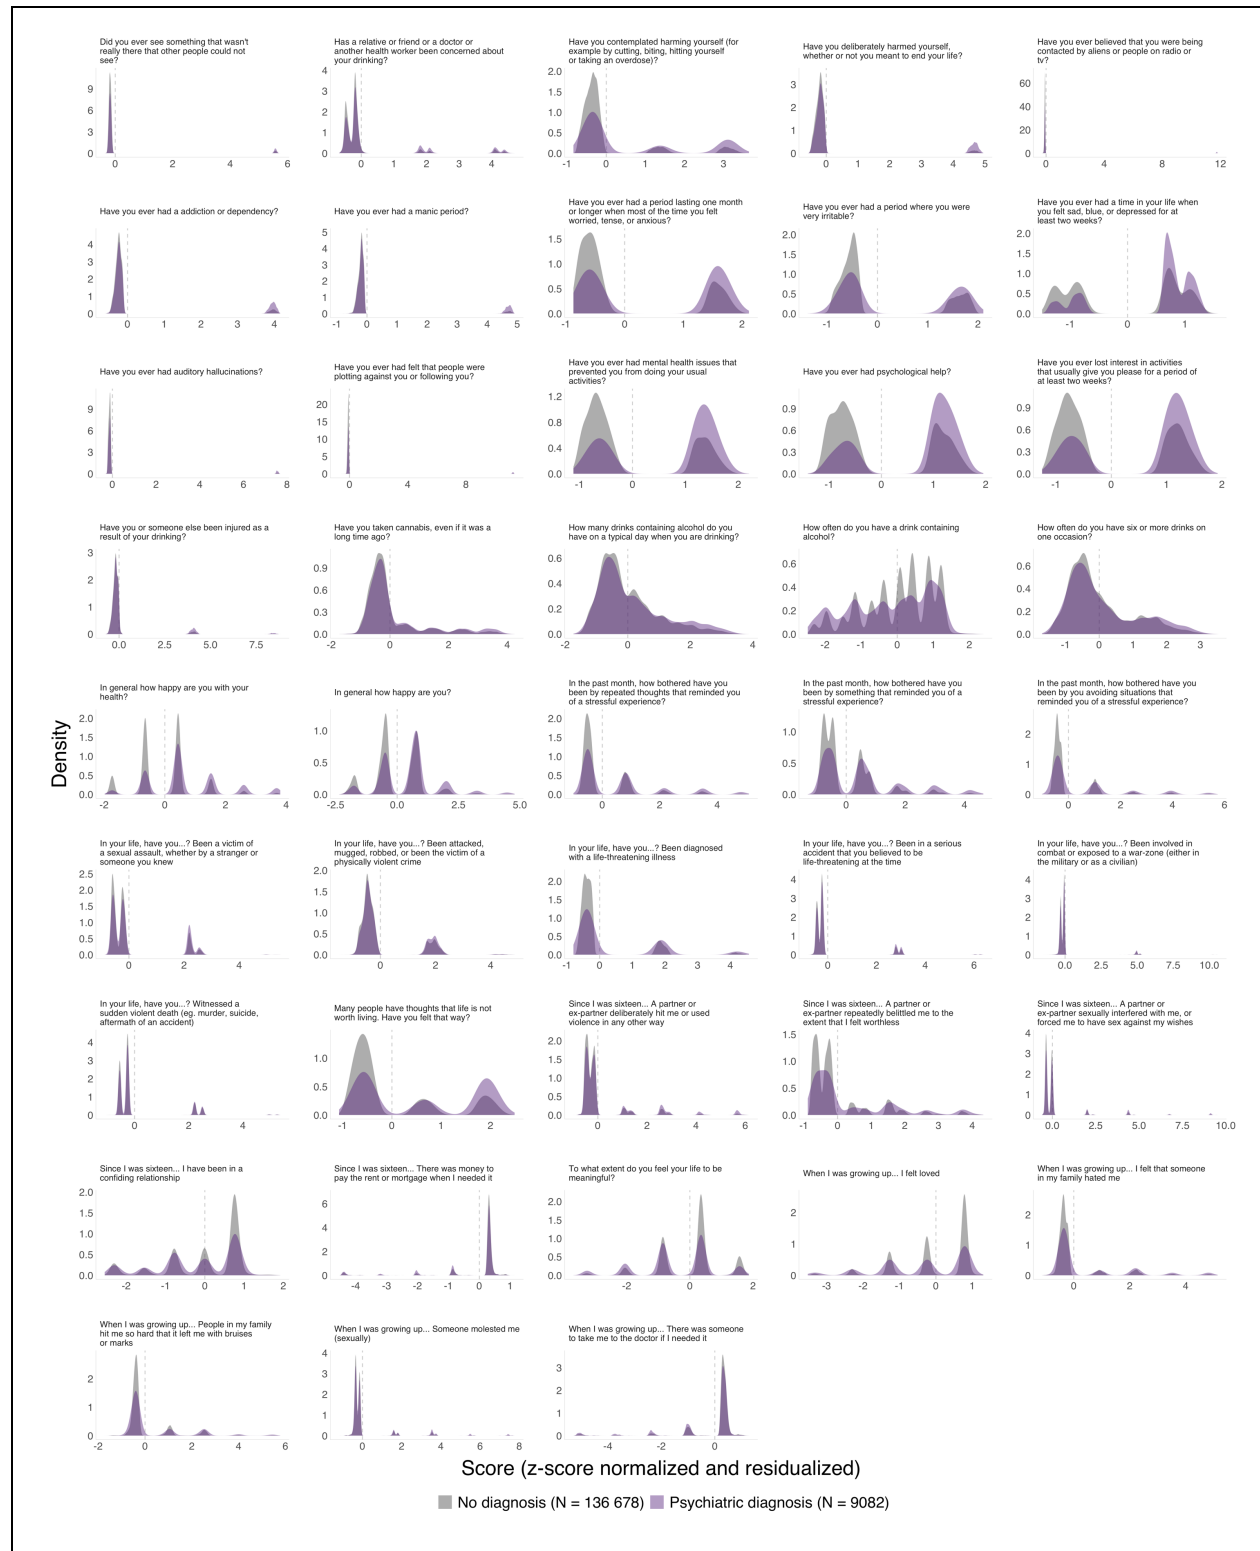

**Suppl. Fig. 2. Z-normalized question scores** Density plot of the scores comparing the sample of individuals without psychiatric or neurological diagnosis to the individuals with a diagnosed psychiatric disorder. With a few notable exceptions, distributions are fairly similar, supporting that mental health data from healthy individuals can be used to study psychiatric disorders. As expected, in the exceptions

where distributions were different, individuals with a psychiatric diagnosis had higher scores overall compared to healthy individuals.

452

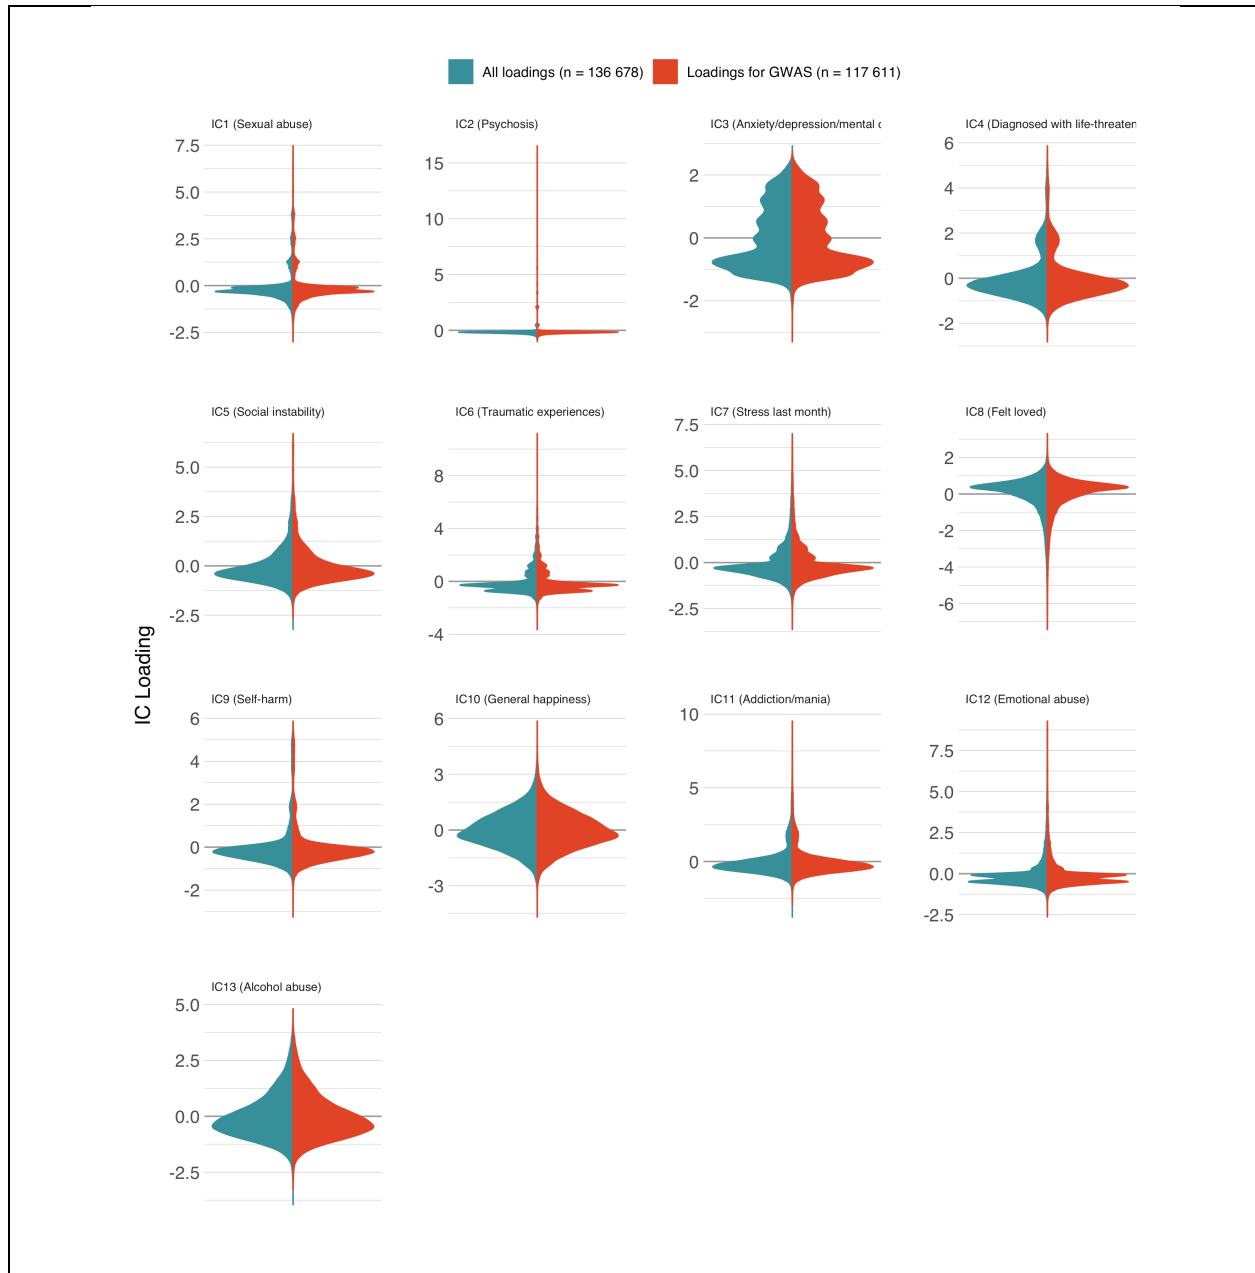

loadings reflect higher symptoms. IC2 has a very narrow distribution, with a few high loadings. IC10 showed a wide distribution due to the universal nature of the questions that comprise this component.

453

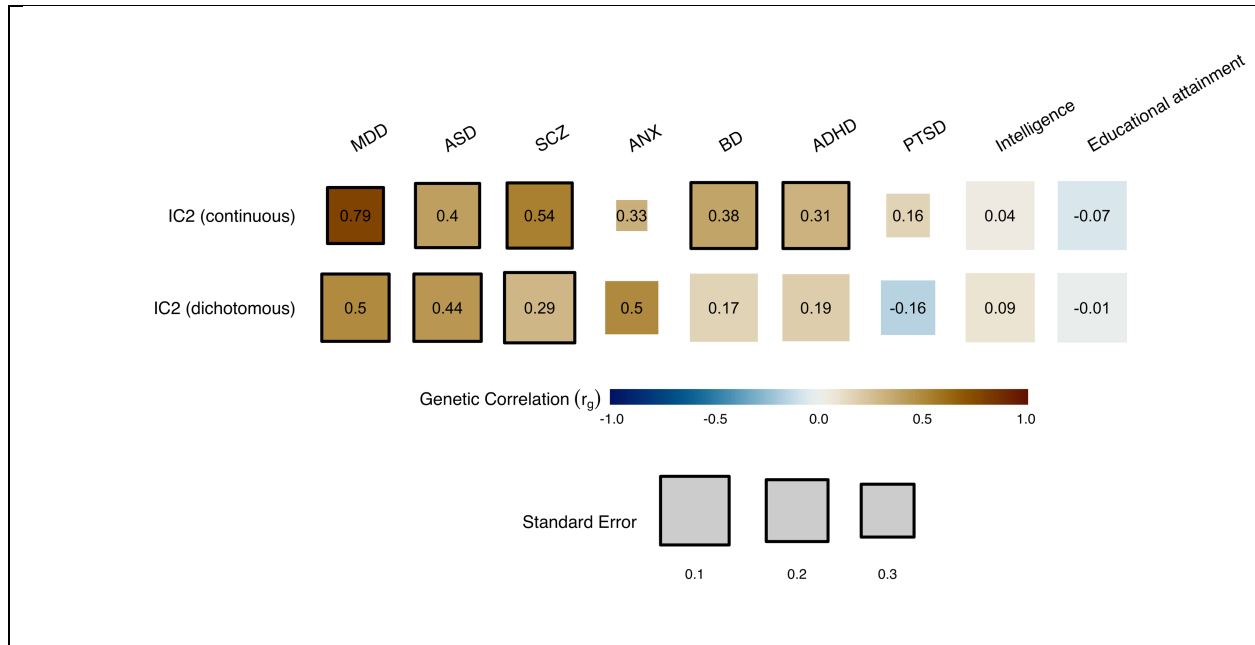

**Suppl. Fig. 4. Comparison between continuous and dichotomous IC2** Due to the low variance in IC2 particularly (Suppl. Fig. 3), we investigated if dichotomizing the loading on that component would improve heritability (i.e. loadings larger than 1 were used as cases, lower than 1 were used as controls in a case-control GWAS). This dichotomous approach is conceptually similar to the approach taken by Legge and colleagues<sup>25</sup> who recently reported a genetic correlation between SCZ and dichotomous psychosis symptoms (yes/no). However, dichotomizing did not improve the estimates strongly. Heritability was only slightly higher ( $h^2_{\text{dichotomous}} = 0.0133$  vs  $h^2_{\text{continuous}} = 0.0089$ ) and the reported association with SCZ decreased from  $r_{g \text{ continuous}} = 0.5427$  to  $r_{g \text{ dichotomous}} = 0.2945$ . The standard error was more than halved after dichotomization ( $SE_{\text{continuous}} = 0.1527$  vs  $SE_{\text{dichotomous}} = 0.0711$ ), suggesting a slight benefit of the dichotomization in scenarios where data distributions limit the continuous approach. In the main analyses, we decided to stay consistent with the other components and keep the phenotype as a continuous measure for IC2, yet we provide results with the dichotomized component for comparison in this figure. Correlations are mostly the same for the continuous and the dichotomous component. The continuous IC2 correlated stronger with MDD compared to the dichotomous IC2, which correlated less strongly with MDD, but stronger with ASD and ANX compared to the continuous IC2. Errors were relatively similar.

454

Roelfs et al. | Phenotypically independent mental health profiles are genetically related

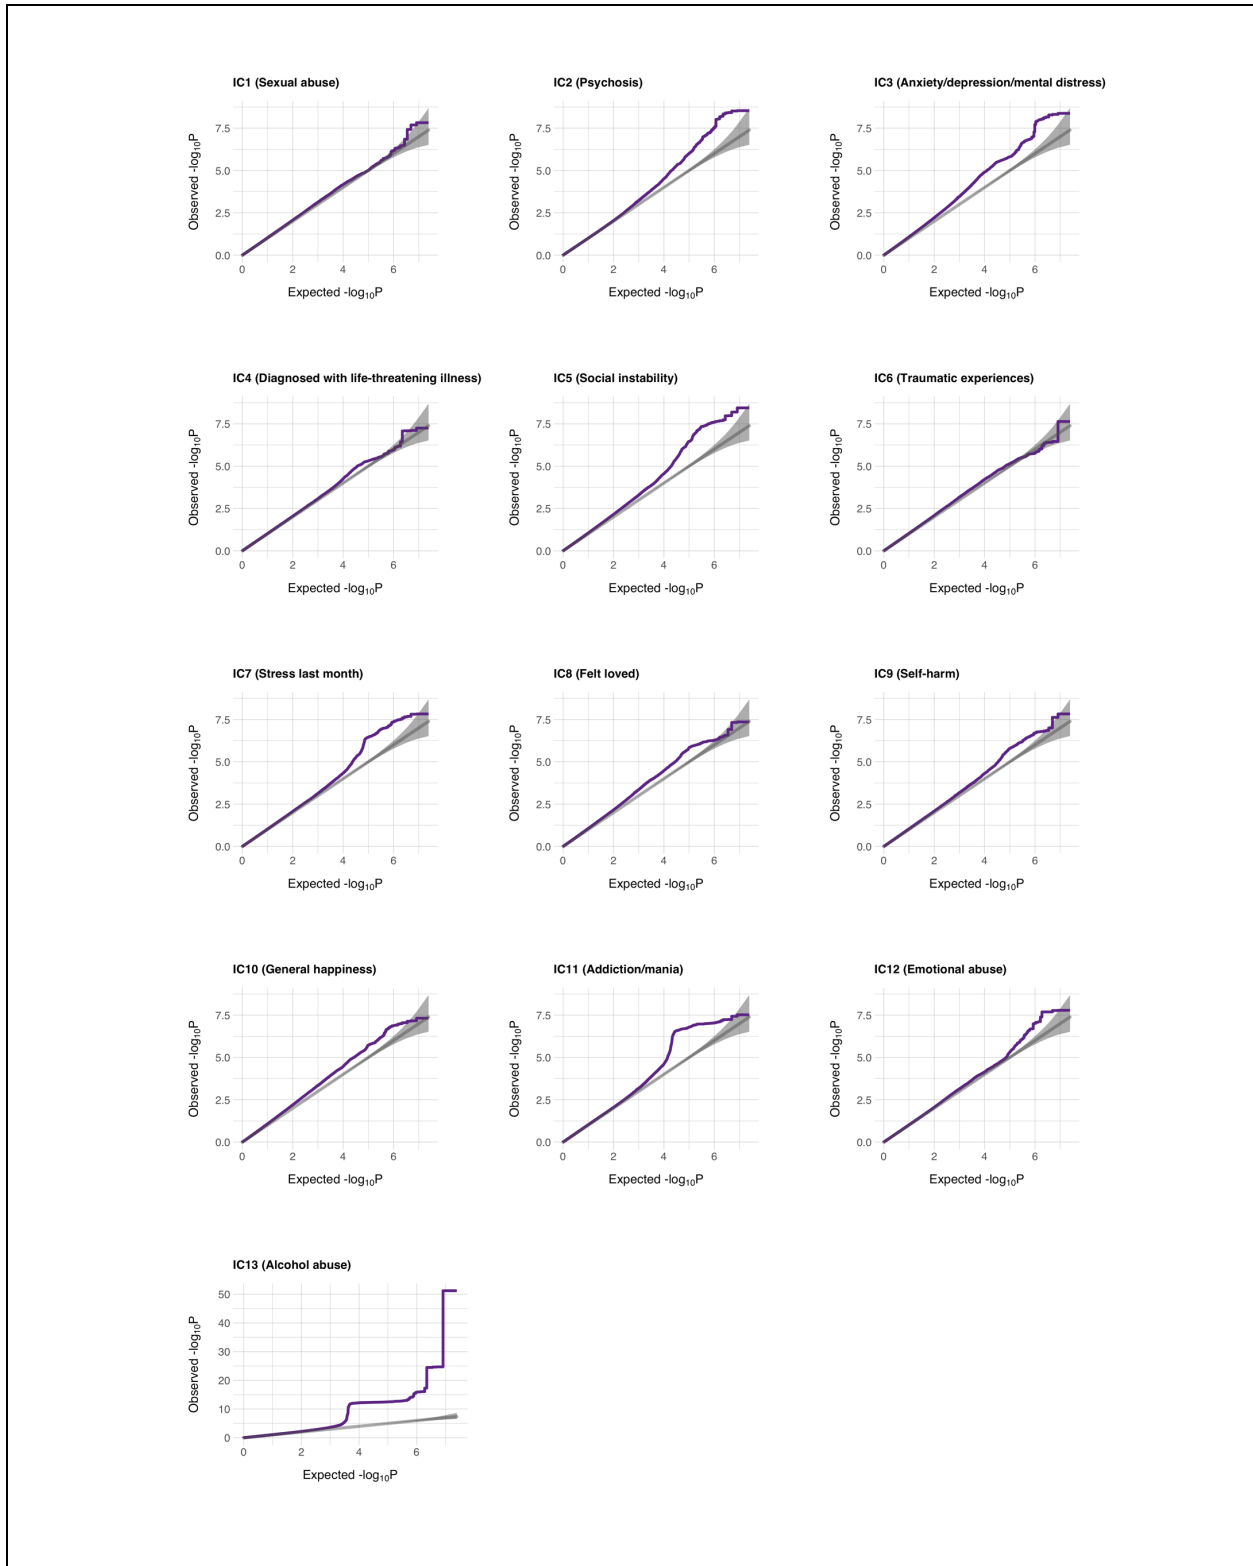

**Suppl. Fig. 5. Q-Q plots** Q-Q plots showing the genetic signal from each of the ICs. IC13 showed the strongest signal. IC2 showed a strong signal despite having the lowest  $h^2$ . None of the GWAS summary statistics showed any noticeable inflation.

Roelfs et al. | Phenotypically independent mental health profiles are genetically related

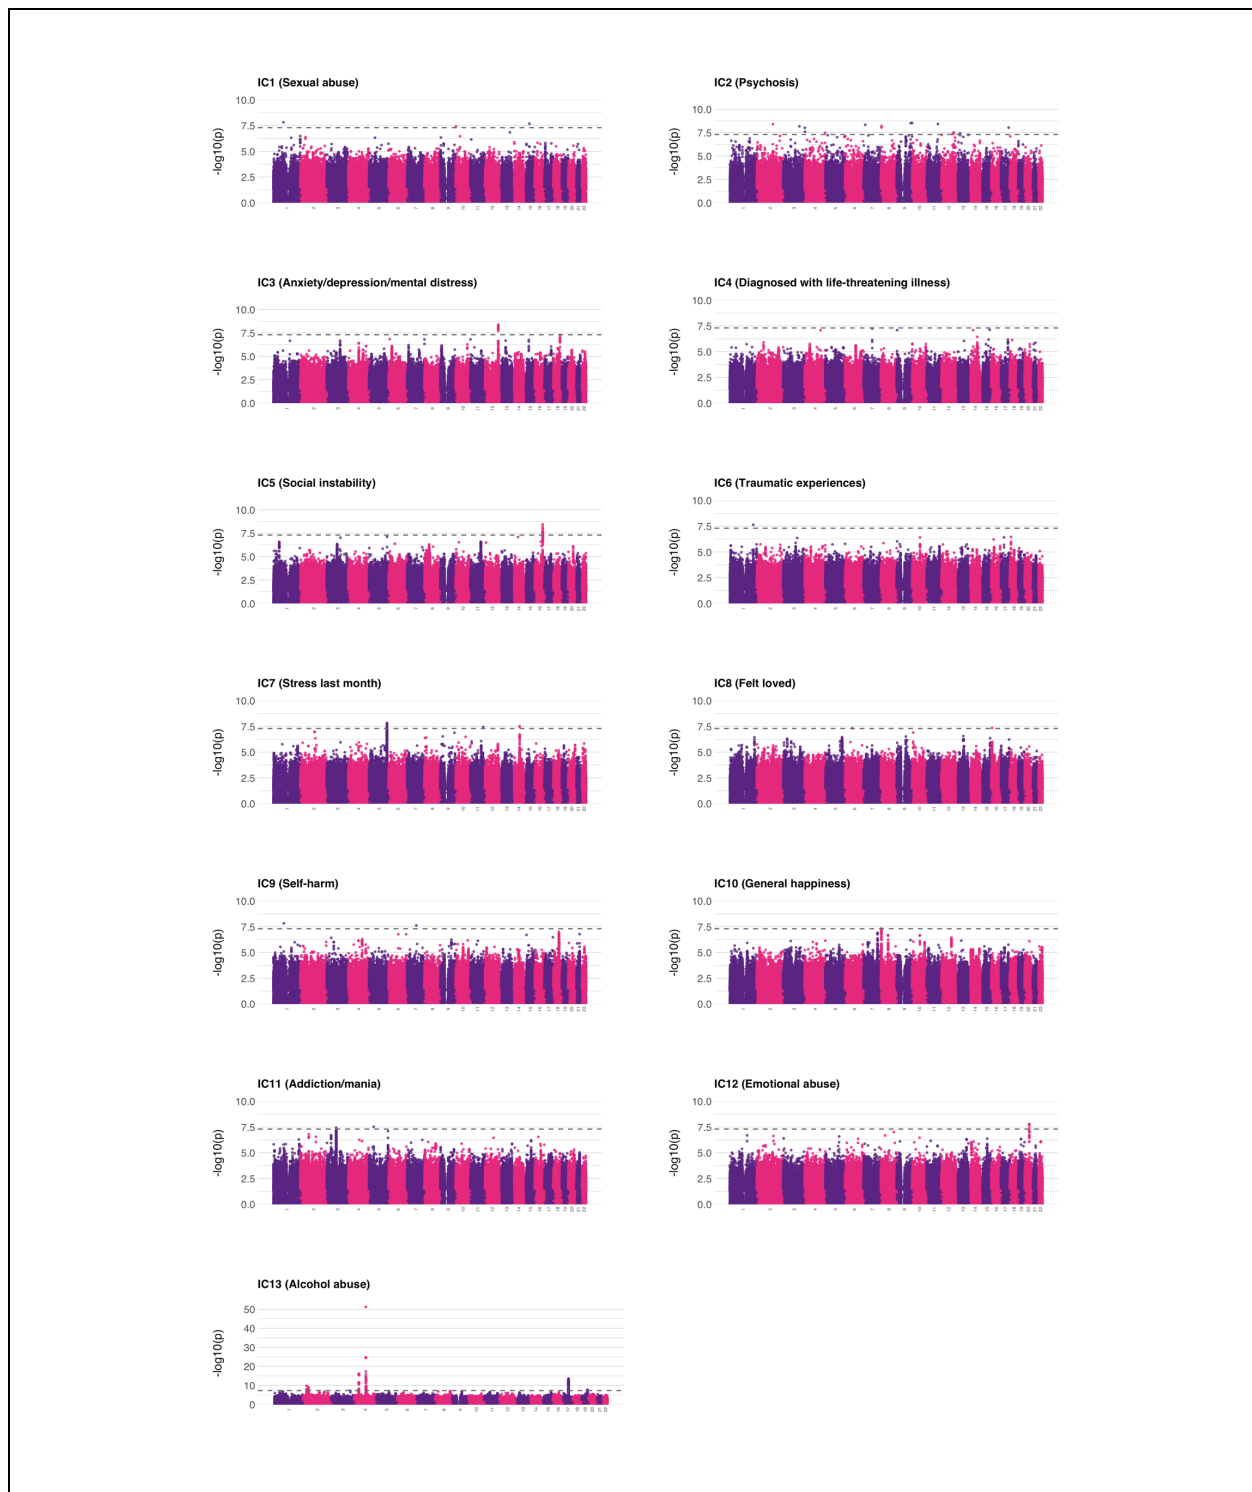

**Suppl. Fig. 6. Manhattan plots for the ICs** Significance threshold set at  $5e-8$ . Only IC4 had no genome-wide significant hits, a few more had no lead SNPs, according to FUMA.
